# Supplementary material
Source: publisher figshare collection journal article supplement (https://acs.figshare.com/ndownloader/files/8676187)

## Supporting Information

### **Hydroxyl Group Regulated Nano-Pd/C Catalyst Generation via In-situ Reduction of Pd(NH<sub>3</sub>)<sub>x</sub>Cl<sub>y</sub>/C for N-Formylation of Amine with CO<sub>2</sub>/H<sub>2</sub>**

Yujing Zhang, Hongli Wang, Hangkong Yuan, Feng Shi\*

State Key Laboratory for Oxo Synthesis and Selective Oxidation, Centre for Green Chemistry and Catalysis, Lanzhou Institute of Chemical Physics, Chinese Academy of Sciences, Lanzhou, 730000, China.

## **Table of Contents**

|                                                             |            |
|-------------------------------------------------------------|------------|
| <b>I. General Information and Experimental Section.....</b> | <b>S1</b>  |
| <b>II. Characterization results of catalysts.....</b>       | <b>S7</b>  |
| <b>III.Characterization data for products .....</b>         | <b>S19</b> |
| <b>IV.NMR spectra of the products.....</b>                  | <b>S24</b> |

## **I. General Information and Experimental Section**

All solvents and chemicals were obtained commercially and were used as received.

NMR spectra were measured using a Bruker ARX 400 or ARX 100 spectrometer at 400 MHz ( $^1\text{H}$ ) and 100 MHz ( $^{13}\text{C}$ ). All spectra were recorded in  $\text{CDCl}_3$  and chemical shifts ( $\delta$ ) are reported in ppm relative to tetramethylsilane referenced to the residual solvent peaks. Mass spectra were in general recorded on an HP 6890/5973 GC-MS.

### **X-ray diffraction (XRD)**

XRD patterns of samples were obtained on a STADI P automated transmission diffractometer instrument equipped with an incident beam curved germanium monochromator selecting Cu  $\text{K}\alpha_1$  radiation (40 KV and 40 mA) was used as the X-ray source. The precipitated particles were dried in air and pressed on a glass slide for analysis.

### **Transmission Electron Microscopy (TEM)**

For the prepared catalysts, the particle dispersion was diluted by ethanol, and then 10  $\mu\text{L}$  of dispersion was cast on the TEM grids with a micro-pipet. TEM images were obtained on a Tecnai G2 F30 S-Twin operating at 300 kV.

### **X-ray Photoelectron Spectroscopy (XPS)**

The XPS measurements were performed with a VG ESCALAB 210 instrument provided with a dual Mg/Mg anode X-ray source, a hemispherical capacitor analyser and a 5 keV  $\text{Ar}^+$  ion-gun. All spectra were recorded using non-monochromatic Mg  $\text{K}\alpha$  (1253.6 eV) radiation.

### **BET and ICP-AES analysis**

Nitrogen adsorption-desorption isotherms were measured at 77 K using Micromeritics 2010 instrument. The pore-size distribution was calculated by Barrett, Joyner and Halenda (BJH) method from desorption isotherm. The Pd content of the catalyst was measured by inductively coupled plasma-atomic emission spectrometry (ICP-AES), using an Iris advantage Thermo Jarrel Ash device.

### **Typical procedure for carbon support preparation**

The carbon materials were prepared via sol-gel polymerization of resorcinol and formaldehyde with  $\text{Na}_2\text{CO}_3$  as a catalyst. First, a wet RF gel was prepared by polymerization of resorcinol and formaldehyde at 80 °C using a hydrothermal method. Then, the wet RF gel was mixed with KOH or another base and heated at 800 °C under a nitrogen flow. Next the carbonized sample was washed with deionized water to remove the base, and the carbon material was obtained. A series of carbon materials was prepared using this method by varying the type of base. The carbon materials that were not treated with a base are denoted C-none. C-KOH (C-0), C-NaOH, C- $\text{K}_2\text{CO}_3$ , C- $\text{Na}_2\text{CO}_3$ , C- $\text{K}_3\text{PO}_4$  were prepared using various bases (that is, KOH, NaOH,  $\text{K}_2\text{CO}_3$ ,  $\text{Na}_2\text{CO}_3$ ,  $\text{K}_3\text{PO}_4$  respectively) with a fixed ratio of wet RF gel to base (that is, 1 : 1).

The oxidation process was carried out by adding 40 mL of nitric acid (14.5 M, 65%  $\text{HNO}_3$ ) to 4.0 g C-KOH placed in a round-bottom flask. The mixture was heated at 25 °C, 50 °C, 80 °C or 110 °C on hot plate with constant stirring for 1 h, then washed with distilled water to neutral, decanted and the solid sample was dried at 110 °C in air. The carbon materials that were not treated with a nitric acid are denoted C-0 (C-KOH). C-1, C-2, C-3 and C-4 were prepared at different temperatures (that is 25 °C, 50 °C, 80 °C or 110 °C).

### **Typical procedure for carbon supported nano-Pd catalyst preparation**

0.25 g C-KOH-3 and 0.08 mL  $\text{H}_2\text{PdCl}_4$  (aqueous solution, 29.93 mg/mL) were added into 10 mL aqueous solution of ammonia (1 mol/L). After further stirring for 24 h at r.t., the water was removed under vacuum. It was dried at 80 °C in air for 6 h and then reduced under hydrogen flow at 200 °C for 2 h. The resulting catalyst samples were denoted as Pd/C-3.

### **Typical procedure for formylation of amines by $\text{CO}_2$ hydrogenation**

1.0 mmol amines, 50 mg catalyst and 2 mL methanol were added into a 100 mL autoclave equipped with magnetic stirrer. The autoclave was sealed and exchanged with  $\text{CO}_2$  for 2 times and reacted at 130 °C under 1 MPa  $\text{CO}_2$  and 3 MPa  $\text{H}_2$  for 24 h.



Then it was cooled to room temperature. 10 mL ethanol was added to dissolve the reaction mixture and the product was detected by HP 6890/5973 GC-MS. The GC-yield was determined by GC-FID using biphenyl as internal standard and the isolated yields were obtained by flash column chromatography.

#### **Purification Procedure:**

The crude products were subjected to silica gel column chromatography (60, 230-400 mesh supplied by Qingdao Haiyang Chemical and Special Silica Gel Co, Ltd). Eluting with ~75mL of dichloromethane, followed by 300:1 (dichloromethane: Methanol).

#### **Typical procedure for formylation of amines by CO<sub>2</sub> and H<sub>2</sub>**

1.0 mmol piperidine 50 mg catalyst Pd/C-3 (1wt% Pd, 0.47 mol% Pd to 1a), 2 mL methanol, 130 °C and 0.5 mmol KOH were added in to an 100 mL autoclave. It was then exchanged with 1/3 MPa CO<sub>2</sub>/H<sub>2</sub>. The reaction was reacted at 130°C for 24 h under magnetic stirring. Subsequently, the autoclave was cooled to room temperature, and 70 mg biphenyl and 10 mL ethanol were added for quantitative analysis by GC-FID (Agilent 6890A).

**Table S1. Surface Oxygenated Groups by Boehm Titration**

| Sample | carboxylic acid<br>(umol/g) | Lactone<br>(umol/g) | Phenol<br>(umol/g) |
|--------|-----------------------------|---------------------|--------------------|
| C-0    | 0                           | 203                 | 208                |
| C-1    | 119                         | 193                 | 119                |
| C-2    | 188                         | 248                 | 293                |
| C-3    | 382                         | 317                 | 332                |
| C-4    | 2599                        | 997                 | 808                |

**Table S2. The K/C atomic ratio in XPS**

| Sample | K/C atomic ratio | Catalyst | Piperidine yield (%) |
|--------|------------------|----------|----------------------|
| C-0    | 0.00663          | Pd/C-0   | 13                   |
| C-1    | 0.00466          | Pd/C-1   | 11                   |
| C-2    | 0.00609          | Pd/C-2   | 17                   |
| C-3    | 0.00335          | Pd/C-3   | 19                   |
| C-4    | 0.00204          | Pd/C-4   | 16                   |

## II.Characterization results of catalysts

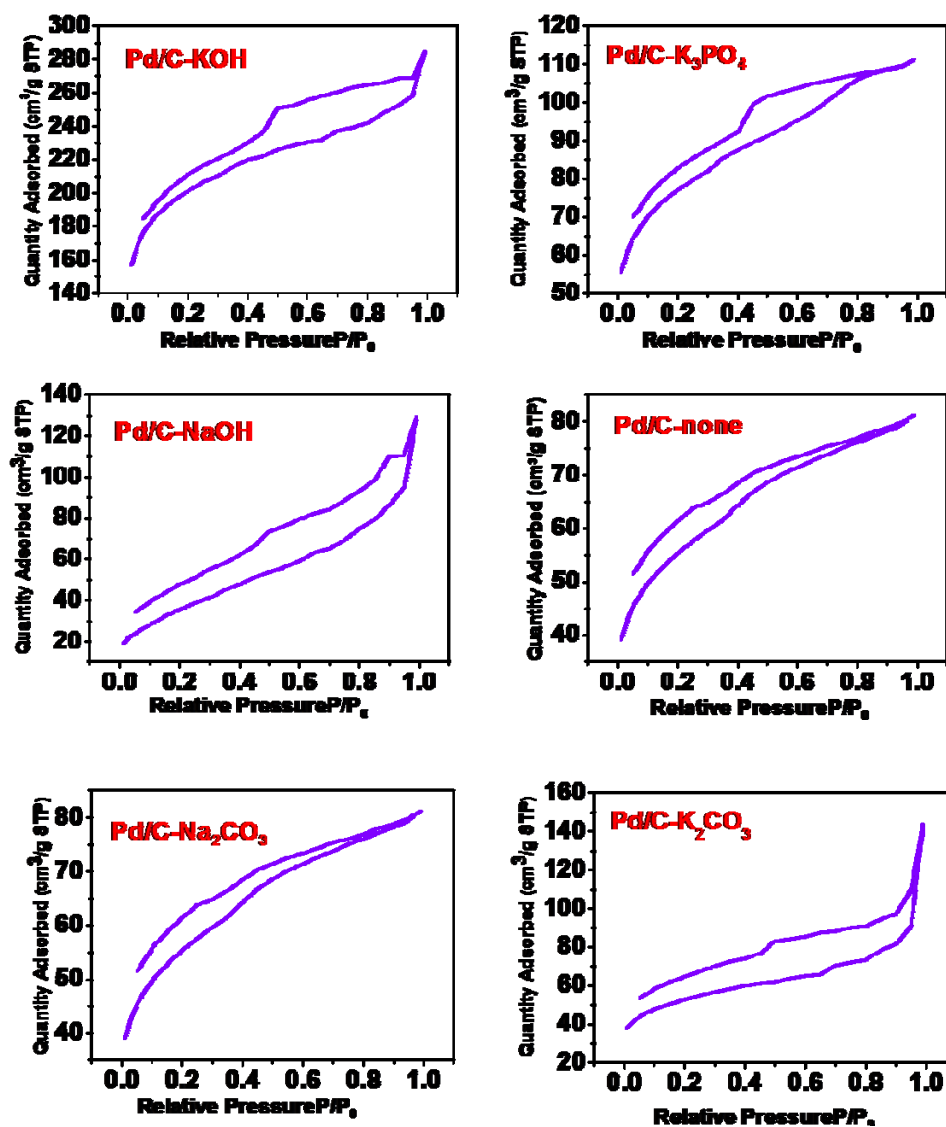

Fig. S1. BET pictures for Pd/C- $\text{K}_2\text{CO}_3$ , Pd/C-NaOH, Pd/C-none, Pd/C- $\text{K}_3\text{PO}_4$ , Pd/C-KOH and Pd/C- $\text{Na}_2\text{CO}_3$ .

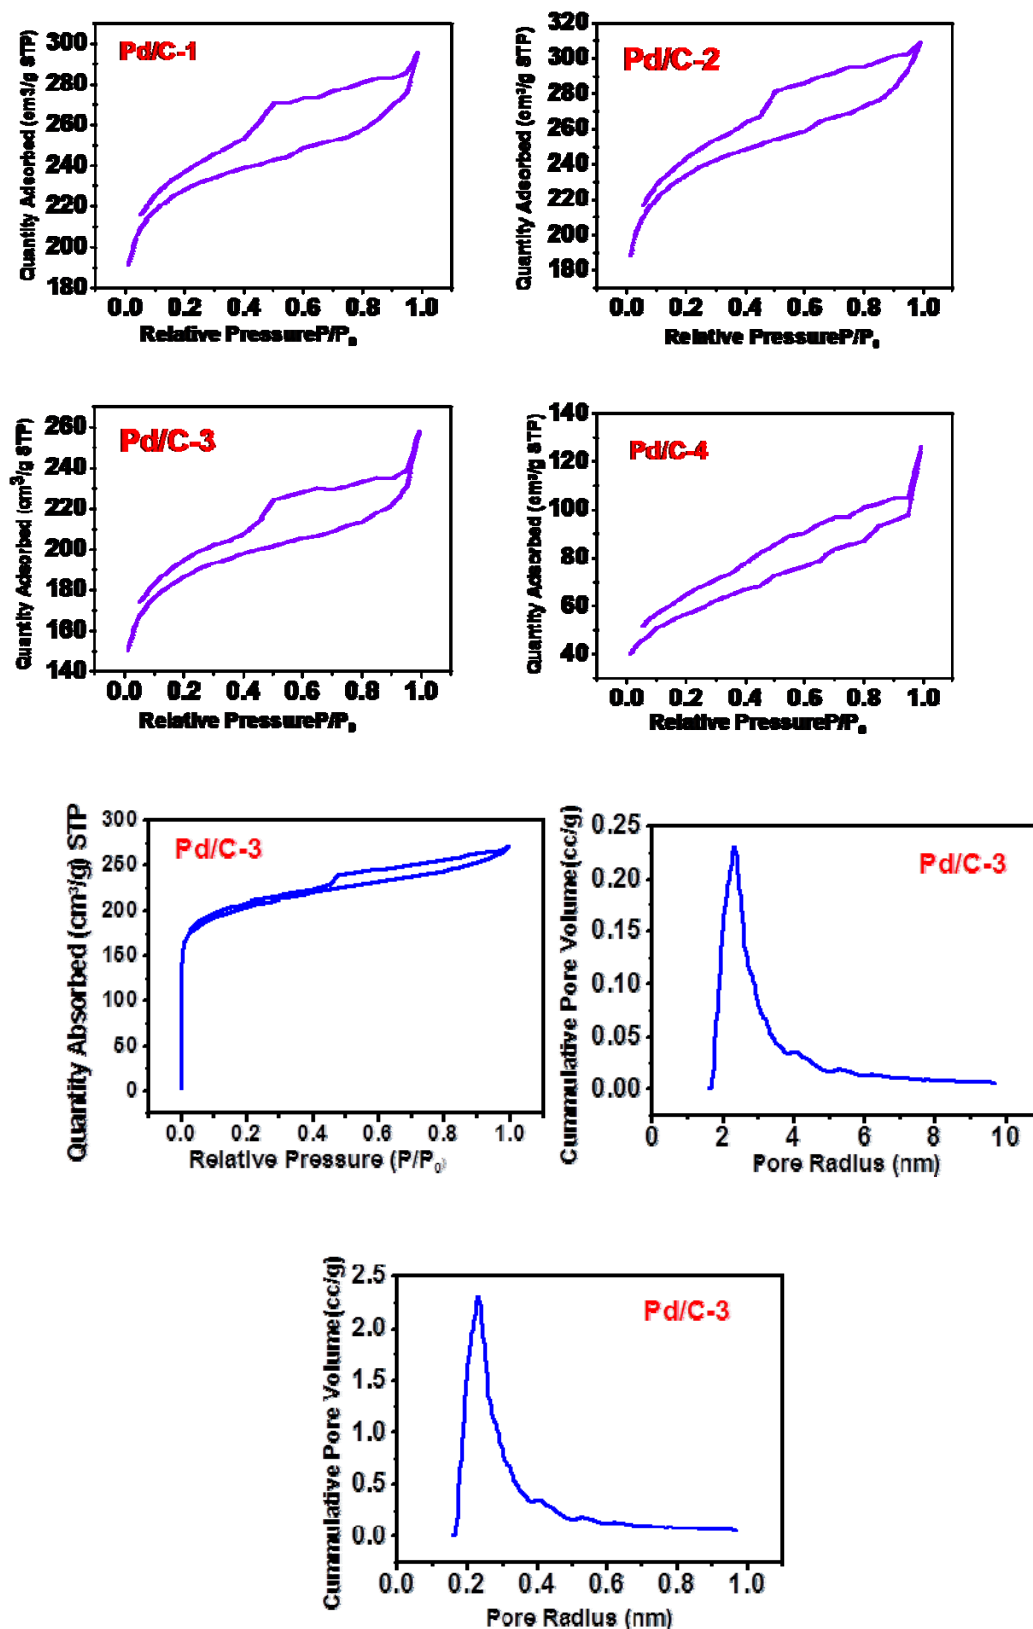

Fig. S2. BET pictures for Pd/C-1, Pd/C-2, Pd/C-3, Pd/C-4.

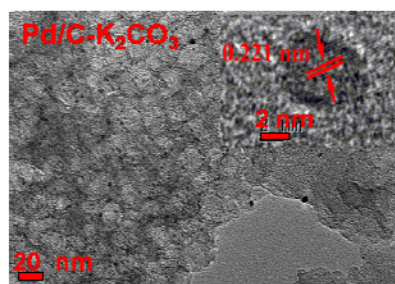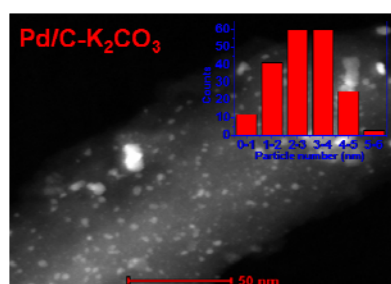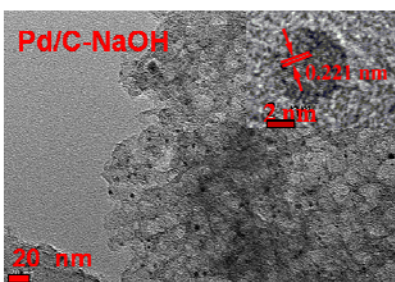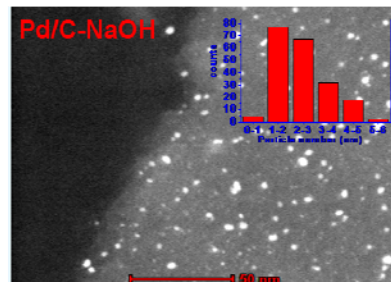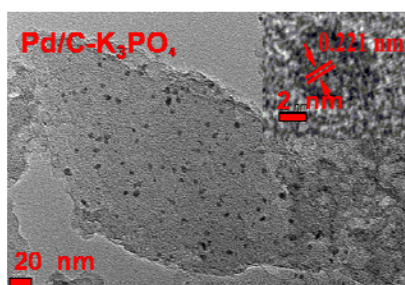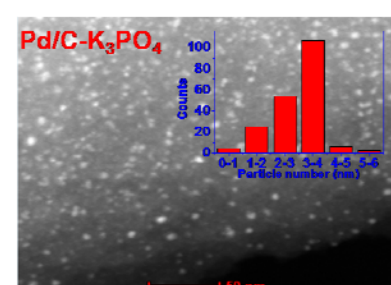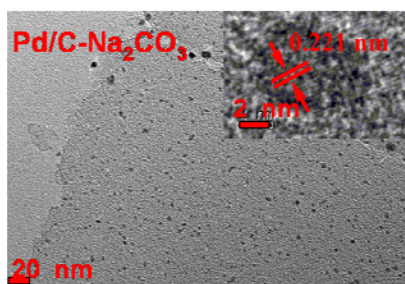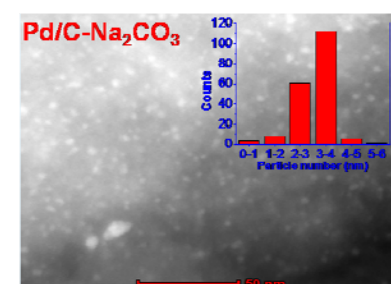

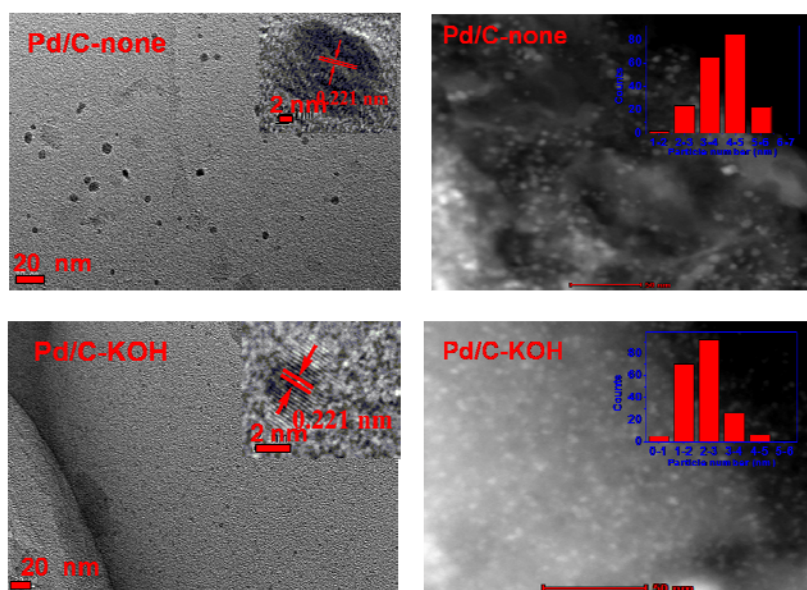

Fig. S3. TEM and HADDF-STEM images for Pd/C-K<sub>2</sub>CO<sub>3</sub>, Pd/C-NaOH, Pd/C-none, Pd/C-K<sub>3</sub>PO<sub>4</sub>, Pd/C-KOH and Pd/C-Na<sub>2</sub>CO<sub>3</sub>.

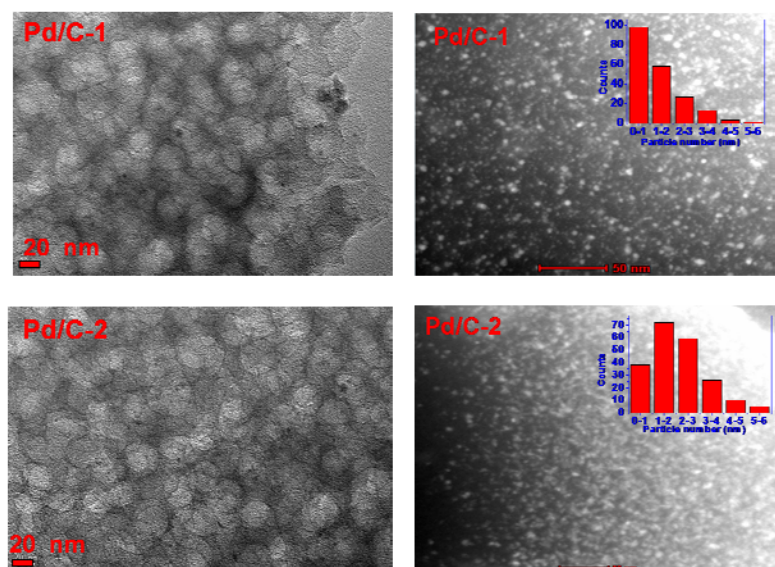



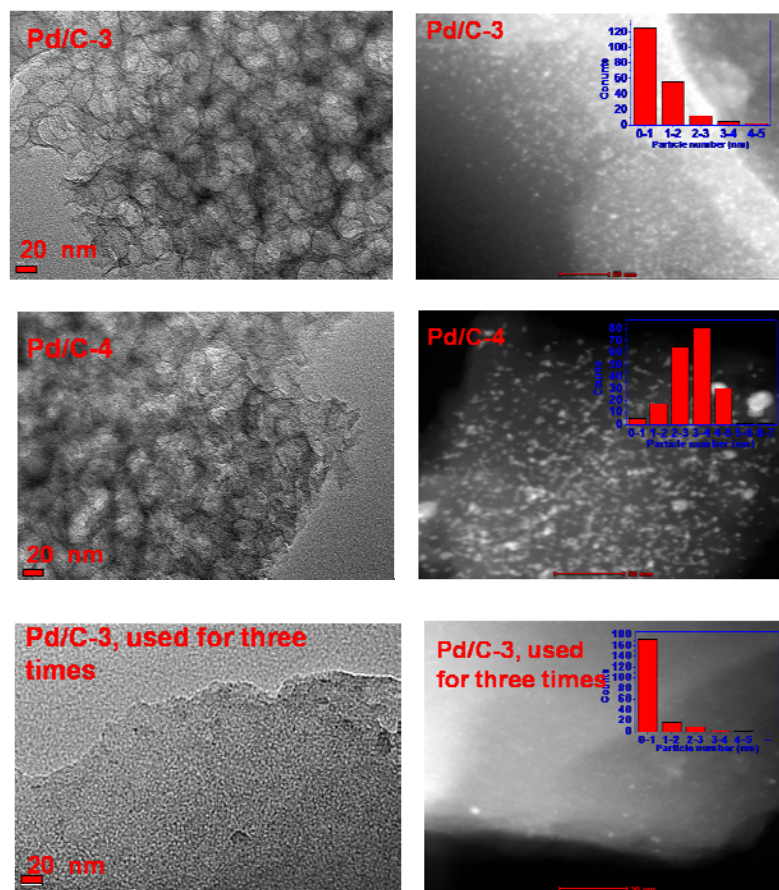

Fig. S4. TEM and HADDF-STEM pictures for Pd/C-1, Pd/C-2, Pd/C-3, Pd/C-4, Pd/C-3 and used for three times.

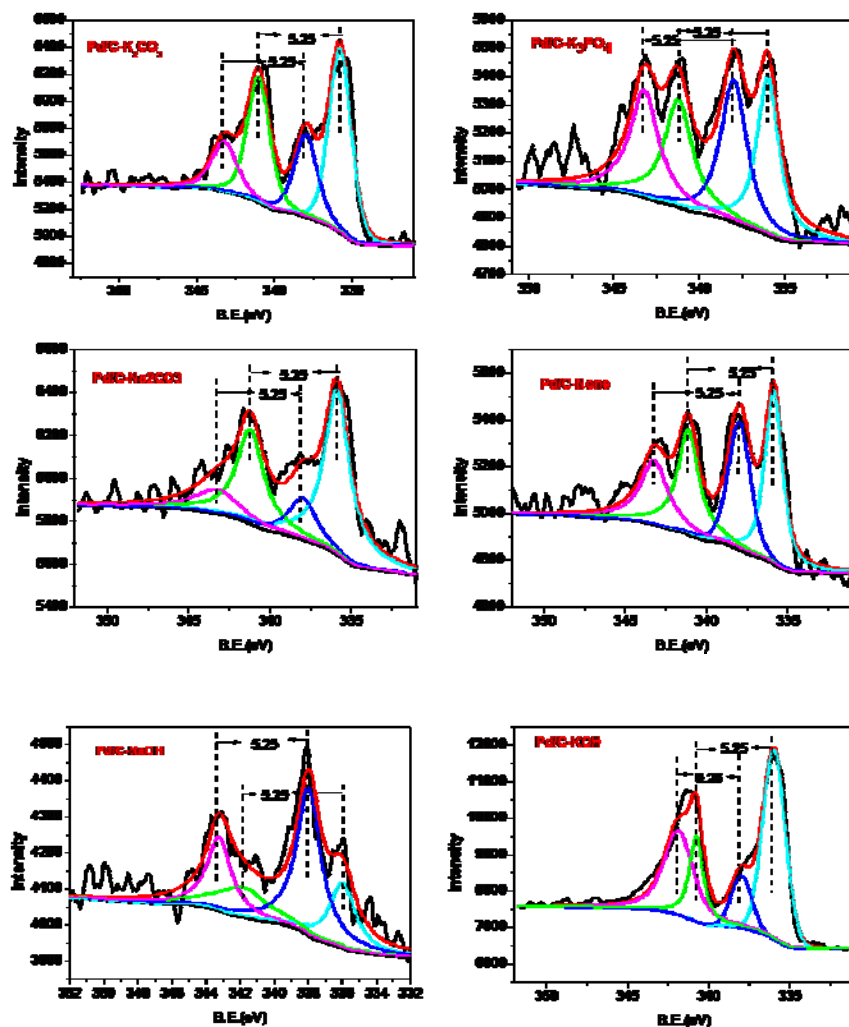

Fig. S5. XPS pictures for Pd/C-K<sub>2</sub>CO<sub>3</sub>, Pd/C-NaOH, Pd/C-none, Pd/C-K<sub>3</sub>PO<sub>4</sub>, Pd/C-KOH and Pd/C-Na<sub>2</sub>CO<sub>3</sub>.



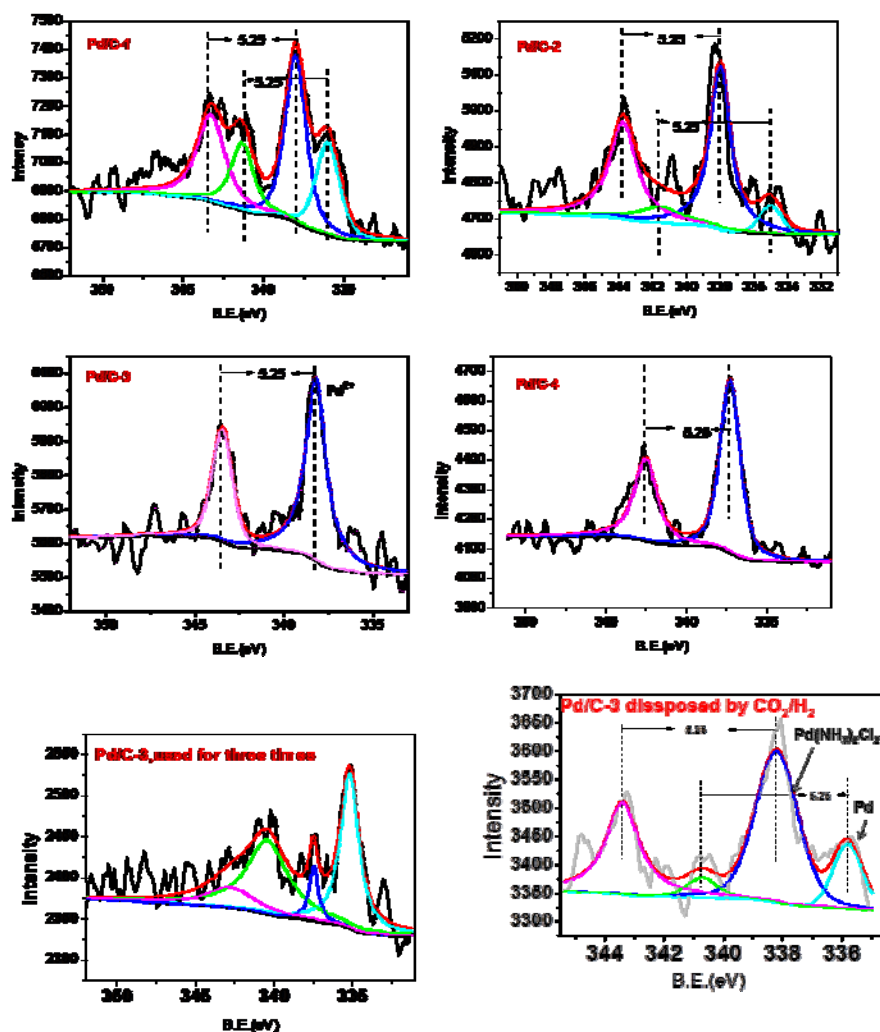

Fig. S6. XPS pictures for Pd/C-1, Pd/C-2, Pd/C-3, Pd/C-4, Pd/C-3 used for three times, and Pd/C-3 submitted to CO<sub>2</sub> + H<sub>2</sub>

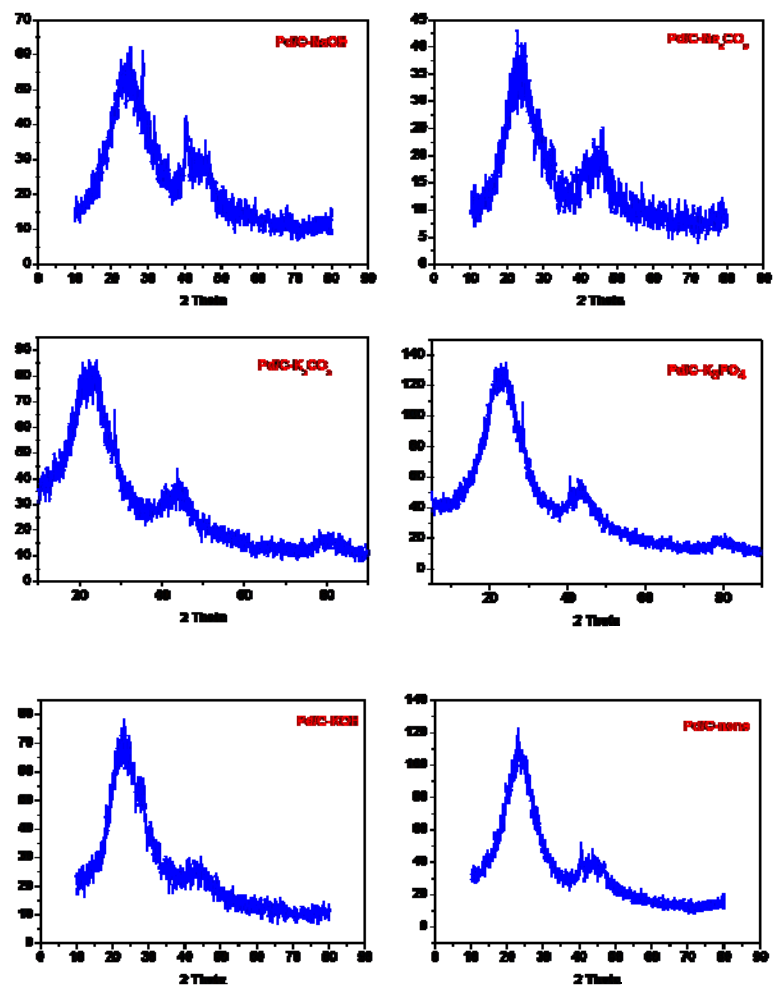

Fig. S7. XRD pictures for Pd/C-K<sub>2</sub>CO<sub>3</sub>, Pd/C-NaOH, Pd/C-none, Pd/C-K<sub>3</sub>PO<sub>4</sub>, Pd/C-KOH and Pd/C-Na<sub>2</sub>CO<sub>3</sub>.

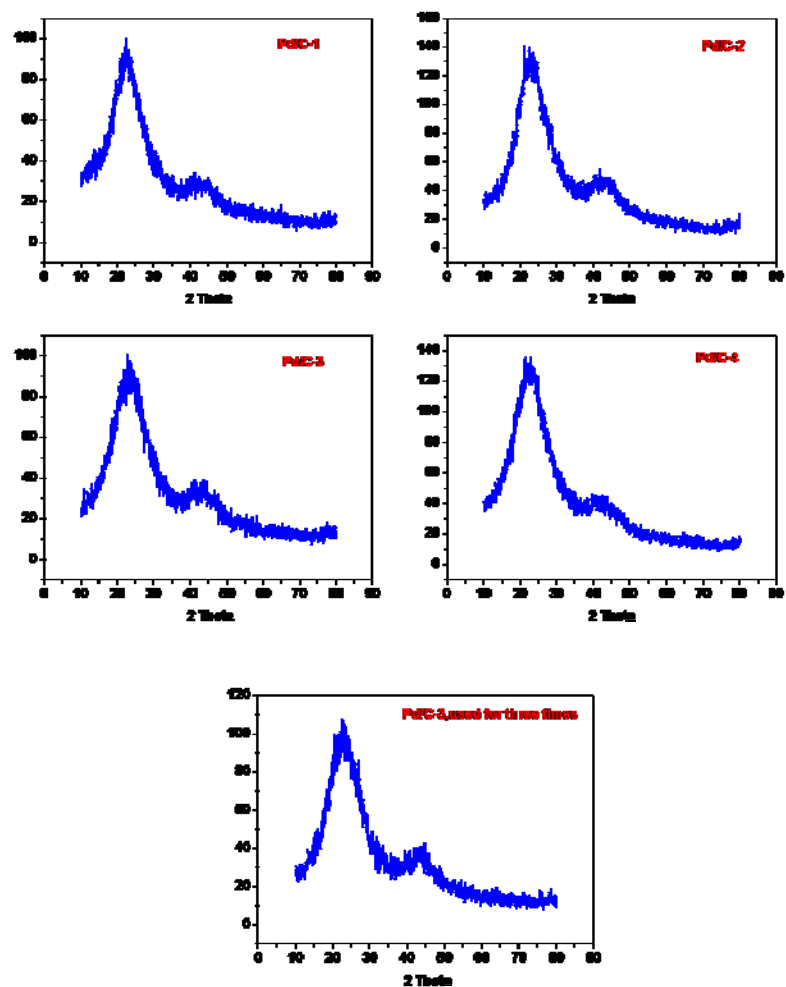

Fig. S 8. XRD pictures for Pd/C-1, Pd/C-2, Pd/C-3, Pd/C-4 and Pd/C-3 and used for three times.

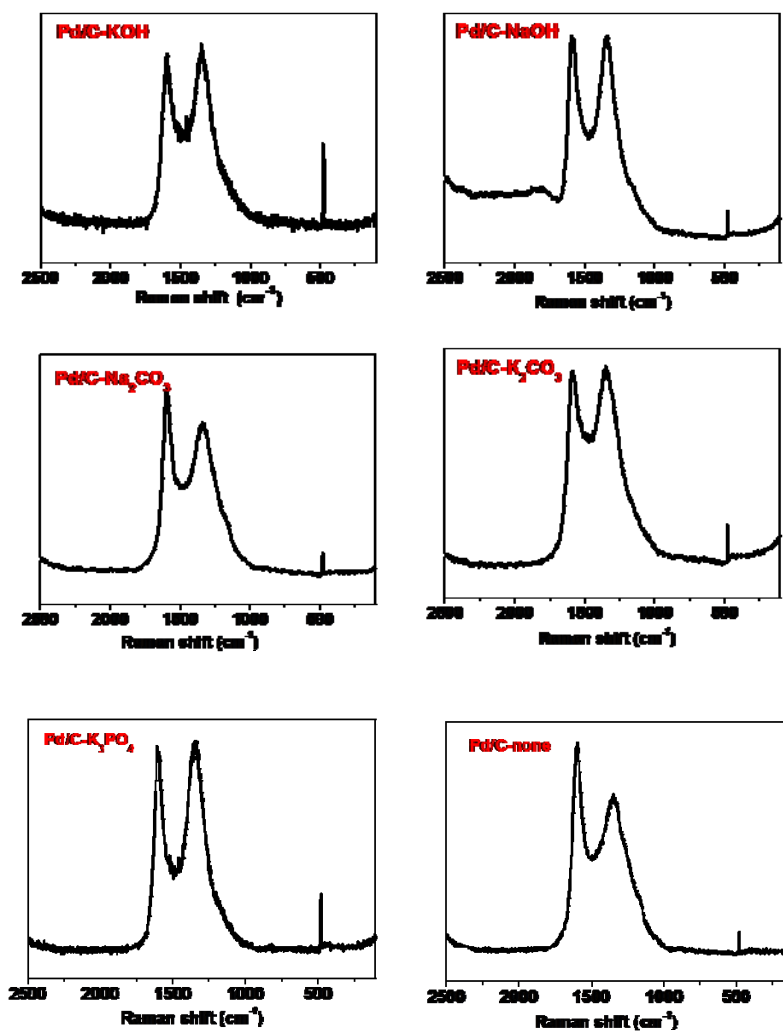

Fig. S9. Raman pictures for Pd/C- $\text{K}_2\text{CO}_3$ , Pd/C-NaOH, Pd/C-none, Pd/C- $\text{K}_3\text{PO}_4$ , Pd/C-KOH and Pd/C- $\text{Na}_2\text{CO}_3$ .

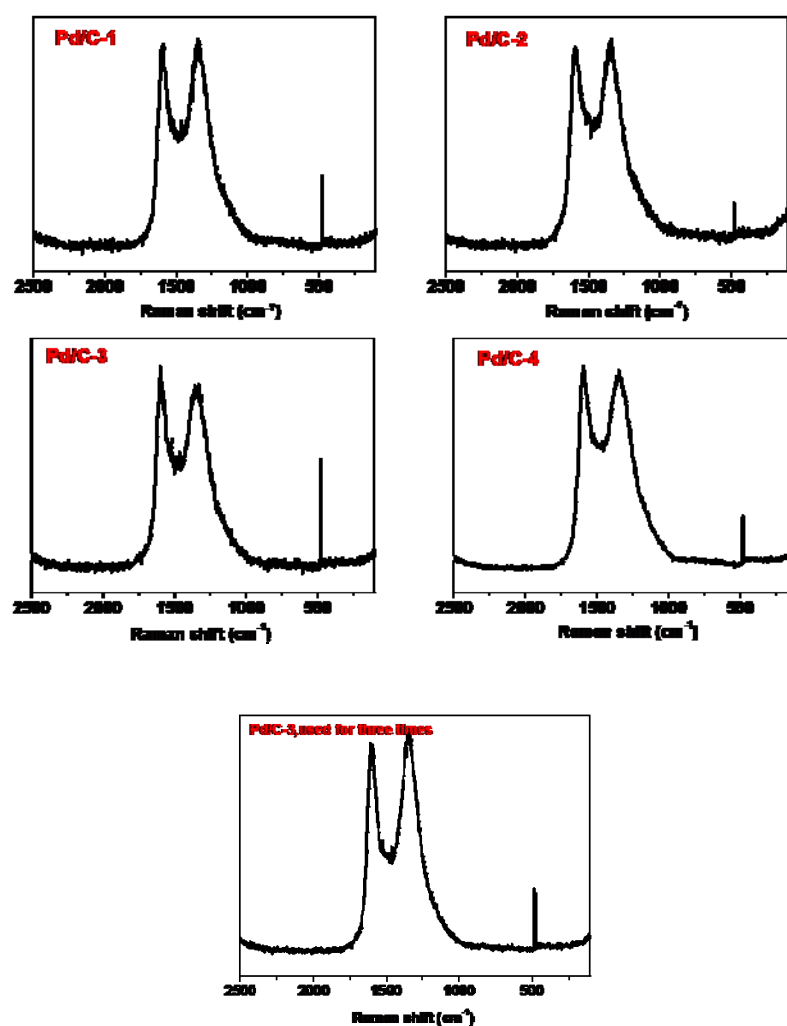

Fig. S10. Raman pictures for Pd/C-1, Pd/C-2, Pd/C-3, Pd/C-4, Pd/C-3 and used for three times.

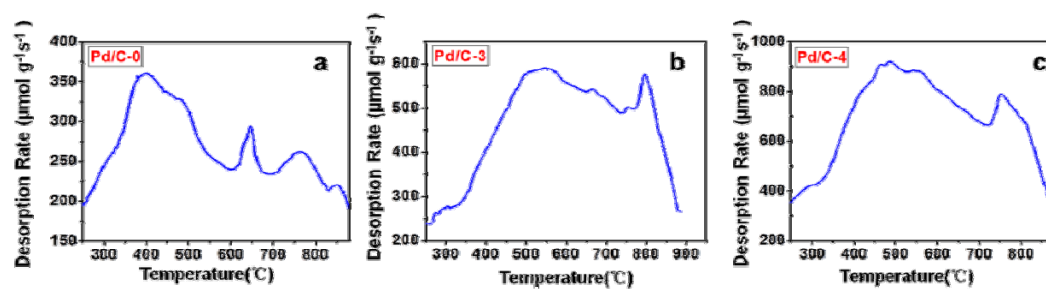

Fig. S11. CO<sub>2</sub>-TPD profiles of a) Pd/C-0, b) Pd/C-3, c) Pd/C-4

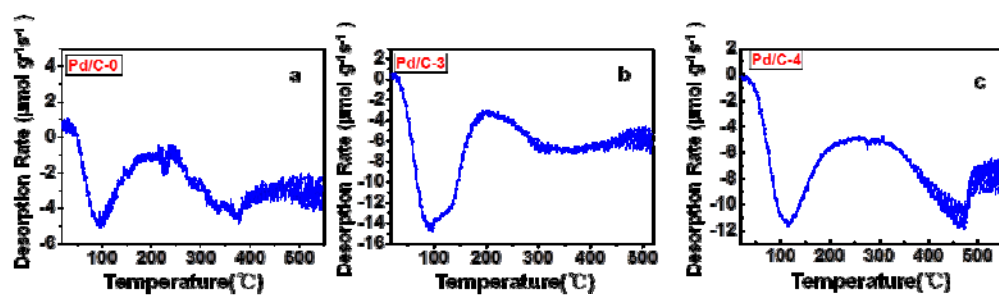

Fig. S12. NH<sub>3</sub>-TPD profiles of a) Pd/C-0, b) Pd/C-3, c) Pd/C-4

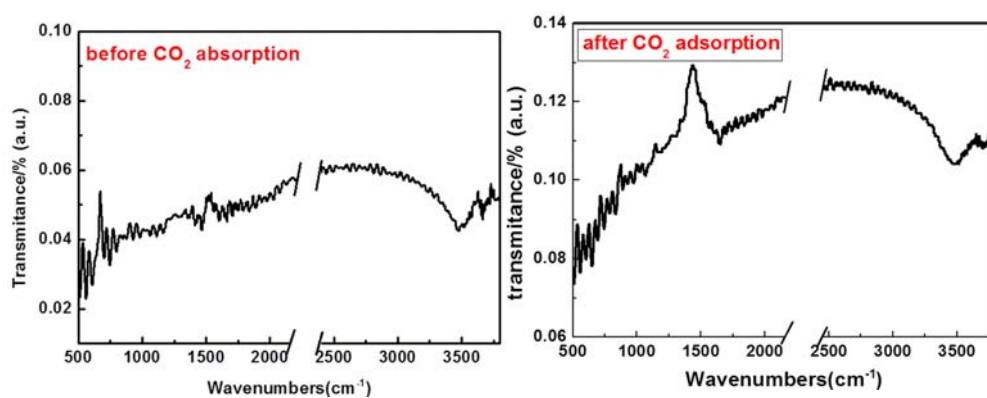

Fig. S13. CO<sub>2</sub> adsorption tests

### III.Characterization data for products

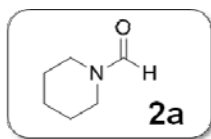

**N-Formylpiperidine (2a):** The title compound was prepared according to the general procedure and purified by column chromatography to give the yellow oil, 85 mg, 93% yield.  $^1\text{H}$  NMR (400 MHz,  $\text{CDCl}_3$ )  $\delta$  8.00 (s, 1H), 3.52–3.41 (m, 2H), 3.37–3.27 (m, 2H), 1.69 (td,  $J$  = 6.5, 2.1 Hz, 2H), 1.61–1.52 (m, 4H);  $^{13}\text{C}$  NMR (100 MHz,  $\text{CDCl}_3$ )  $\delta$  160.83, 46.84, 40.63, 26.57, 25.07, 24.70.

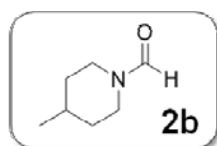

**1-methylpiperidine-4-carbaldehyde (2b):** The title compound was prepared according to the general procedure and purified by column chromatography to give the yellow oil, 93 mg, 65% yield.  $^1\text{H}$  NMR (400 MHz,  $\text{CDCl}_3$ )  $\delta$  8.03 (s, 1H), 3.56 (d,  $J$  = 4.1 Hz, 2H), 3.42–3.37 (m, 2H), 2.52–2.33 (m, 5H), 2.33–2.30 (m, 3H);  $^{13}\text{C}$  NMR (101 MHz,  $\text{CDCl}_3$ )  $\delta$  160.72, 55.28, 54.11, 46.03, 45.43, 39.74.

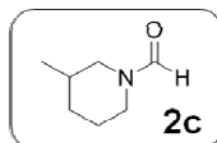

**3-methylpiperidine-1-carbaldehyde (2c):** The title compound was prepared according to the general procedure and purified by column chromatography to give the yellow oil, 97 mg, 73% yield.  $^1\text{H}$  NMR (400 MHz,  $\text{CD}_3\text{OD}$ )  $\delta$  7.94 (d,  $J$  = 4.8 Hz, 1H), 4.15–3.94 (m, 1H), 3.55 (dd,  $J$  = 10.2, 2.8 Hz, 1H), 2.77–2.60 (m, 1H), 1.82 (dd,  $J$  = 13.1, 3.6 Hz, 1H), 1.7 –1.60 (m, 1H), 1.59–1.23 (m, 3H), 1.2 –1.13 (m, 1H), 0.89 (d,  $J$  = 6.6 Hz, 3H);  $^{13}\text{C}$  NMR (101 MHz,  $\text{CDCl}_3$ )  $\delta$  162.99, 162.93, 54.41, 48.01, 47.63, 41.21, 34.04, 34.01, 33.26, 32.03, 26.95, 25.47, 19.12, 18.82.

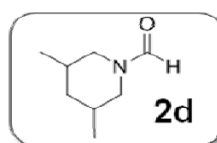

**3,5-dimethylpiperidine-1-carbaldehyde (2d) :** The title compound was prepared according to the general procedure and purified by column chromatography to give the yellow oil, 108mg, 84% yield.  $^1\text{H}$  NMR (400 MHz,  $\text{CD}_3\text{OD}$ )  $\delta$  8.07 (s, 1H), 4.40–4.20 (m, 1H), 3.76–3.62 (m, 1H), 2.69 (t,  $J$  = 12.2 Hz, 1H), 2.22 (t,  $J$  = 12.2 Hz, 1H), 1.92 (d,  $J$  = 13.2 Hz, 1H), 1.67–1.43 (m, 2H), 1.01 (dd,  $J$  = 6.6, 1.9 Hz, 6H), 0.97–0.86 (m, 1H);  $^{13}\text{C}$  NMR (101 MHz,  $\text{CDCl}_3$ )  $\delta$  161.30, 52.59, 46.16, 41.94, 32.17, 30.76, 17.80, 17.50.

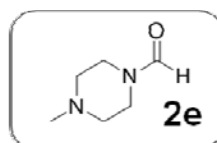

**1-Formyl-4-methylpiperazine (2e) :** The title compound was prepared according to the general procedure and purified by column chromatography to give the yellow oil, 123 mg, 69% yield.  $^1\text{H}$  NMR

(400 MHz, CD<sub>3</sub>OD)  $\delta$  8.02 (s, 1H), 3.58–3.51 (m, 2H), 3.49–3.43 (m, 2H), 2.51–2.44 (m, 2H), 2.43–2.39 (m, 2H), 2.32 (s, 3H); <sup>13</sup>C NMR (101 MHz, CDCl<sub>3</sub>)  $\delta$  163.09, 56.26, 55.10, 46.36, 46.11, 40.52.

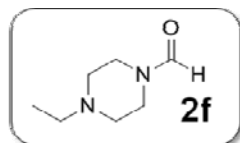

**4-ethylpiperazine-1-carbaldehyde (2f)** : The title compound was prepared according to the general procedure and purified by column chromatography to give the yellow oil, 142 mg, 78% yield. <sup>1</sup>H NMR (400 MHz, CDCl<sub>3</sub>)  $\delta$  8.01 (s, 1H), 3.57 (s, 2H), 3.40 (dd, *J* = 6.7, 3.1 Hz, 2H), 2.47–2.38 (m, 6H), 1.09 (dd, *J* = 8.3, 6.1 Hz, 3H); <sup>13</sup>C NMR (101 MHz, CDCl<sub>3</sub>)  $\delta$  160.70, 53.17, 52.25, 51.95, 45.58, 39.91, 11.82–11.21.

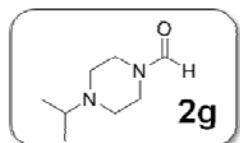

**4-isopropylpiperazine-1-carbaldehyde (2g)** : The title compound was prepared according to the general procedure and purified by column chromatography to give the yellow oil, 165 mg, 68% yield. <sup>1</sup>H NMR (400 MHz, CDCl<sub>3</sub>)  $\delta$  8.01 (s, 1H), 3.56 (s, 2H), 3.38 (d, *J* = 3.9 Hz, 2H), 2.82–2.71 (m, 1H), 2.54–2.43 (m, 4H), 1.05 (dd, *J* = 6.5, 1.9 Hz, 6H); <sup>13</sup>C NMR (101 MHz, CDCl<sub>3</sub>)  $\delta$  160.66, 54.67, 49.11, 47.87, 46.02, 40.34, 18.24.

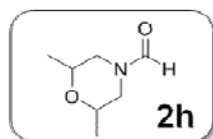

**2,6-dimethylmorpholine-4-carbaldehyde (2h)** : The title compound was prepared according to the general procedure and purified by column chromatography to give the yellow oil, 142mg, 89% yield. <sup>1</sup>H NMR (400 MHz, CD<sub>3</sub>OD)  $\delta$  8.04 (s, 1H), 4.82 (d, *J* = 1.7 Hz, 1H), 4.17 (d, *J* = 13.0 Hz, 1H), 3.64–3.49 (m, 2H), 2.84 (dd, *J* = 13.2, 11.1 Hz, 1H), 2.42 (dd, *J* = 12.9, 10.9 Hz, 1H), 1.18 (dd, *J* = 6.1, 3.8 Hz, 6H); <sup>13</sup>C NMR (101 MHz, CDCl<sub>3</sub>)  $\delta$  163.21, 74.11, 73.11, 52.47, 46.93, 19.18, 18.88.

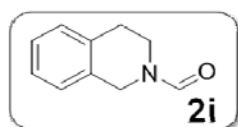

**N-Formyl-1,2,3,4-tetrahydroisoquinoline(2i)** : The title compound was prepared according to the general procedure and purified by column chromatography to give the yellow oil, 165 mg, 83% yield. <sup>1</sup>H NMR (400 MHz, CD<sub>3</sub>OD)  $\delta$  8.18 (dd, *J* = 19.3, 3.1 Hz, 1H), 7.24–6.90 (m, 4H), 4.63–4.47 (m, 2H), 3.71–3.58 (m, 2H), 2.85 (dd, *J* = 11.2, 5.5 Hz, 2H); <sup>13</sup>C NMR (101 MHz, CDCl<sub>3</sub>)  $\delta$  163.93, 163.45, 135.56, 135.14, 133.96, 132.82, 129.98, 128.07, 127.74, 127.67, 127.53, 126.98, 48.26, 44.51, 43.15, 39.25–39.16, 30.54–30.12, 28.79.

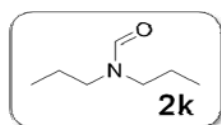



**N,N-dipropylformamide (2k)** : The title compound was prepared according to the general procedure and purified by column chromatography to give the yellow oil, 143 mg, 76% yield.  $^1\text{H NMR}$  (400 MHz,  $\text{CDCl}_3$ )  $\delta$  8.06 (s, 1H), 3.26 (dd,  $J$  = 8.3, 6.9 Hz, 2H), 3.17 (t,  $J$  = 7.1 Hz, 2H), 1.68–1.44 (m, 4H), 0.96 – 0.84 (m, 6H);  $^{13}\text{C NMR}$  (101 MHz,  $\text{CDCl}_3$ )  $\delta$  162.82, 49.17, 43.75, 21.81, 20.52, 11.31, 10.91.

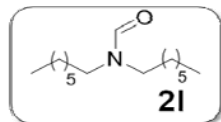

**N,N-diheptylformamide**: The title compound was prepared according to the general procedure and purified by column chromatography to give the yellow oil, 212 mg, 71% yield.  $^1\text{H NMR}$  (400 MHz,  $\text{CDCl}_3$ )  $\delta$  8.04 (s, 1H), 3.33–3.24 (m, 2H), 3.19 (t,  $J$  = 7.1 Hz, 2H), 1.53 (s, 4H), 1.29 (s, 20H), 0.89 (dd,  $J$  = 6.3, 4.7 Hz, 6H);  $^{13}\text{C NMR}$  (101 MHz,  $\text{CDCl}_3$ )  $\delta$  162.66, 47.46, 42.14, 31.77, 31.73, 29.30, 29.20, 29.15, 28.68, 27.32, 26.96, 26.48, 22.61, 14.04.

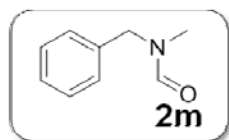

**N-benzyl-N-methylformamide(2m)**: The title compound was prepared according to the general procedure and purified by column chromatography to give the yellow oil, 153 mg, 82% yield.  $^1\text{H NMR}$  (400 MHz,  $\text{CDCl}_3$ )  $\delta$  8.27 (s, 1H), 7.34 (dd,  $J$  = 14.1, 7.5 Hz, 5H), 4.38 (s, 2H), 2.77 (s, 3H);  $^{13}\text{C NMR}$  (101 MHz,  $\text{CDCl}_3$ )  $\delta$  162.79, 162.62, 136.03, 135.77, 128.91, 128.70, 128.25, 128.11, 127.65–127.62, 127.41 (s), 53.48, 47.76, 34.00–32.94, 29.45.

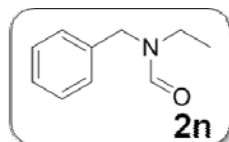

**N-benzyl-N-ethyl-formamide(2n)**: The title compound was prepared according to the general procedure and purified by column chromatography to give the yellow oil, 161 mg, 71% yield.  $^1\text{H NMR}$  (400 MHz,  $\text{CDCl}_3$ )  $\delta$  8.20 (s, 1H), 7.20–7.12 (m, 4H), 4.69 (s, 2H), 3.65 (t,  $J$  = 5.9 Hz, 2H), 2.92–2.86 (m, 3H);  $^{13}\text{C NMR}$  (101 MHz,  $\text{CDCl}_3$ )  $\delta$  161.69, 161.18, 134.48, 133.57, 132.27, 131.81, 129.23, 128.94, 127.14, 126.78, 126.67, 126.52, 125.91, 47.35, 43.27, 42.35, 38.03, 29.77, 27.96.

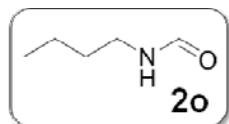

**N-butylformamide (2o)** : The title compound was prepared according to the general procedure and purified by column chromatography to give the yellow oil, 98 mg, 77% yield.  $^1\text{H NMR}$  (400 MHz,  $\text{CDCl}_3$ )  $\delta$  8.15 (s, 1H), 6.05 (s, 1H), 3.35–3.24 (m, 2H), 1.51 (dd,  $J$  = 14.9, 7.3 Hz, 2H), 1.37 (dd,  $J$  = 14.8, 7.5 Hz, 2H), 0.93 (d,  $J$  = 1.4 Hz, 3H);  $^{13}\text{C NMR}$  (101 MHz,  $\text{CDCl}_3$ )  $\delta$  164.76, 161.35, 41.51, 37.89, 33.21, 31.51, 19.97, 19.51, 13.65, 13.54.

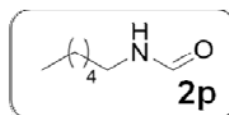

**N-hexylformamide (2p)** : The title compound was prepared according to the general procedure and purified by column chromatography to give the yellow oil, 112 mg, 82% yield.  $^1\text{H}$  NMR (400 MHz,  $\text{CDCl}_3$ )  $\delta$  8.16 (s, 1H), 5.82 (s, 1H), 3.29 (td,  $J$  = 7.5, 1.8 Hz, 2H), 1.55–1.49 (m, 2H), 1.30 (s, 6H), 0.89 (d,  $J$  = 1.5 Hz, 3H);  $^{13}\text{C}$  NMR (101 MHz,  $\text{CDCl}_3$ )  $\delta$  161.19, 38.20, 31.39, 29.47, 26.49, 22.51, 13.95.

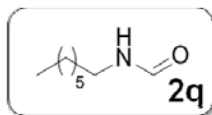

**N-heptylformamide (2q)** : The title compound was prepared according to the general procedure and purified by column chromatography to give the yellow oil, 131 mg, 88% yield.  $^1\text{H}$  NMR (400 MHz,  $\text{CDCl}_3$ )  $\delta$  8.16 (s, 1H), 5.84 (s, 1H), 3.29 (d,  $J$  = 6.2 Hz, 2H), 1.54–1.51 (m, 2H), 1.29 (d,  $J$  = 10.0 Hz, 8H), 0.90–0.86 (m, 3H);  $^{13}\text{C}$  NMR (101 MHz,  $\text{CDCl}_3$ )  $\delta$  161.23, 38.21, 31.71, 29.50, 28.89, 26.79, 22.55, 14.03.

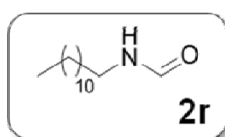

**N-decylformamide(2r)** : The title compound was prepared according to the general procedure and purified by column chromatography to give the White solid, 187 mg, 95% yield.  $^1\text{H}$  NMR (400 MHz,  $\text{CDCl}_3$ )  $\delta$  8.18 (s, 1H), 5.68 (s, 1H), 3.31 (m,  $J$  = 13.4, 6.7 Hz, 2H), 1.56–1.51 (m, 2H), 1.27 (s, 18H), 0.89 (t,  $J$  = 7.1 Hz, 3H);  $^{13}\text{C}$  NMR (101 MHz,  $\text{CDCl}_3$ )  $\delta$  161.15, 65.32, 38.16–37.69, 31.90, 29.52, 29.32, 29.23, 26.84, 22.67, 14.08, 11.09.

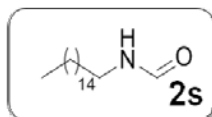

**N-heptadecylformamide (2s)** : The title compound was prepared according to the general procedure and purified by column chromatography to give the White solid, 237 mg, 83% yield.  $^1\text{H}$  NMR (400 MHz,  $\text{CD}_3\text{OD}$ )  $\delta$  7.96 (s, 1H), 3.15 (t,  $J$  = 7.0 Hz, 2H), 1.45 (d,  $J$  = 6.8 Hz, 2H), 1.25 (d,  $J$  = 12.2 Hz, 26H), 0.85 (t,  $J$  = 6.8 Hz, 3H);  $^{13}\text{C}$  NMR (101 MHz,  $\text{CDCl}_3$ )  $\delta$  163.68, 38.99, 33.07, 30.77, 30.70, 30.67, 30.47, 30.36, 27.94, 23.73, 14.43.

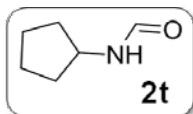

**N-cyclopentylformamide (2t)** : The title compound was prepared according to the general procedure and purified by column chromatography to give the yellow oil, 111 mg, 81% yield.  $^1\text{H}$  NMR (400 MHz,  $\text{CDCl}_3$ )  $\delta$  8.10 (s, 1H), 5.80 (s, 1H), 4.64–3.93 (m, 1H), 1.99 (dd,  $J$  = 7.8, 3.7 Hz, 2H), 1.79–1.55 (m, 4H), 1.42 (dd,  $J$  = 12.4, 6.3 Hz, 2H);  $^{13}\text{C}$  NMR (101 MHz,  $\text{CDCl}_3$ )  $\delta$  160.82, 49.97, 33.07, 23.66.

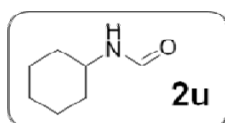

**N-cyclohexylformamide (2u)** : The title compound was prepared according to the general procedure and purified by column chromatography to give the yellow oil, 126 mg, 74% yield.  $^1\text{H NMR}$  (400 MHz,  $\text{CDCl}_3$ )  $\delta$  8.07 (s, 1H), 6.60 (s, 1H), 3.93–3.64 (m, 1H), 1.90 (d,  $J$  = 12.2 Hz, 2H), 1.72 (d,  $J$  = 13.5 Hz, 2H), 1.65–1.27 (m, 4H), 1.20 (d,  $J$  = 11.4 Hz, 2H);  $^{13}\text{C NMR}$  (101 MHz,  $\text{CDCl}_3$ )  $\delta$  163.79, 160.62, 51.13, 47.03, 34.52, 32.83, 25.35, 24.71.

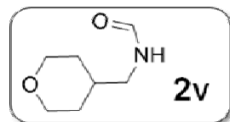

**N-((tetrahydro-2H-pyran-4-yl)methyl)formamide (2v)**: The title compound was prepared according to the general procedure and purified by column chromatography to give the yellow oil, 139 mg, 78% yield.  $^1\text{H NMR}$  (400 MHz,  $\text{CD}_3\text{OD}$ )  $\delta$  8.05 (s, 1H), 3.92 (dd,  $J$  = 10.9, 4.3 Hz, 2H), 3.35 (dd,  $J$  = 11.7, 1.8 Hz, 2H), 3.11 (d,  $J$  = 6.8 Hz, 2H), 1.82–1.67 (m, 1H), 1.62 (dd,  $J$  = 13.1, 1.6 Hz, 2H), 1.27 (qd,  $J$  = 12.1, 4.5 Hz, 3H);  $^{13}\text{C NMR}$  (101 MHz,  $\text{CDCl}_3$ )  $\delta$  163.84, 68.59, 44.54, 36.34, 31.66.

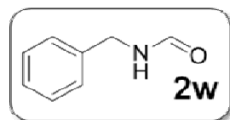

**N-benzylformamide(2w)** : The title compound was prepared according to the general procedure and purified by column chromatography to give the yellow oil, 134 mg, 91% yield.  $^1\text{H NMR}$  (400 MHz,  $\text{CDCl}_3$ )  $\delta$  8.13 (s, 1H), 7.38–7.26 (m, 3H), 7.21 (d,  $J$  = 11.1 Hz, 2H), 7.02–6.47 (m, 1H), 4.38 (d,  $J$  = 5.6 Hz, 2H);  $^{13}\text{C NMR}$  (101 MHz,  $\text{CDCl}_3$ )  $\delta$  161.33–159.38, 137.71, 128.71, 127.69, 127.56, 42.05.

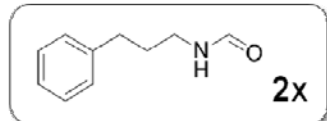

**N-(3-phenylpropyl) formamide (2x)**: The title compound was prepared according to the general procedure and purified by column chromatography to give the yellow oil, 168mg, 92% yield.  $^1\text{H NMR}$  (400 MHz,  $\text{CDCl}_3$ )  $\delta$  8.17 (s, 1H), 7.30 (dd,  $J$  = 11.9, 4.4 Hz, 2H), 7.2–7.17 (m, 3H), 5.77 (s, 1H), 3.35 (q,  $J$  = 6.7 Hz, 2H), 2.68 (t,  $J$  = 7.7 Hz, 2H), 1.88 (dd,  $J$  = 14.8, 7.4 Hz, 2H);  $^{13}\text{C NMR}$  (101 MHz,  $\text{CDCl}_3$ )  $\delta$  161.26, 141.19, 128.52, 128.36, 126.11, 37.83, 33.19, 31.12.

#### IV. NMR spectra of all products

Figure S14.  $^1\text{H}$ NMR of 2a

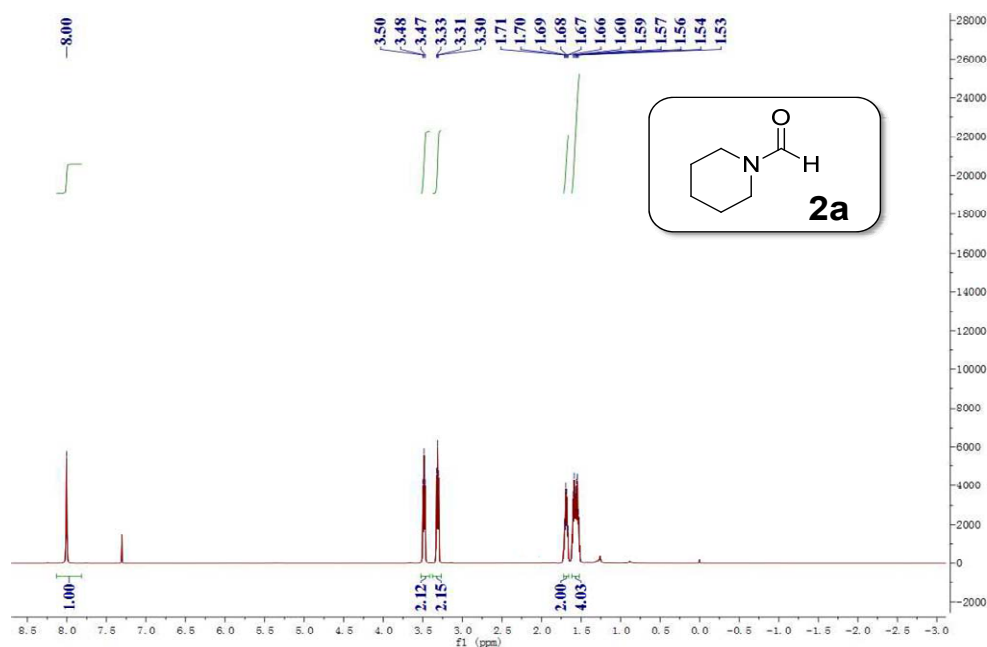

Figure S15.  $^{13}\text{C}$ NMR of 2a

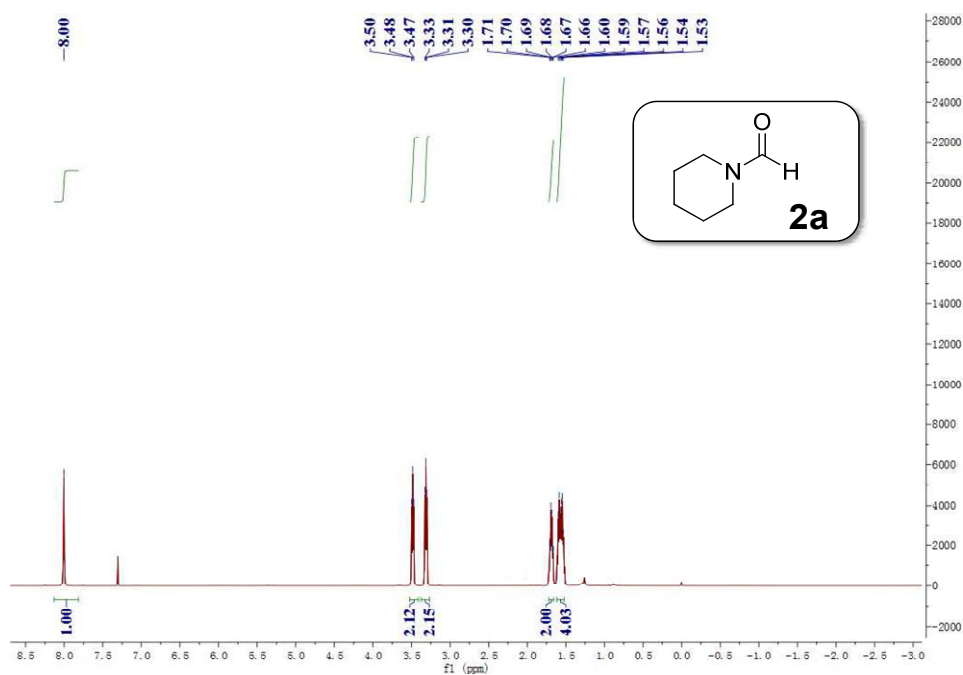

Figure S16.  $^1\text{H}$ NMR of **2b**

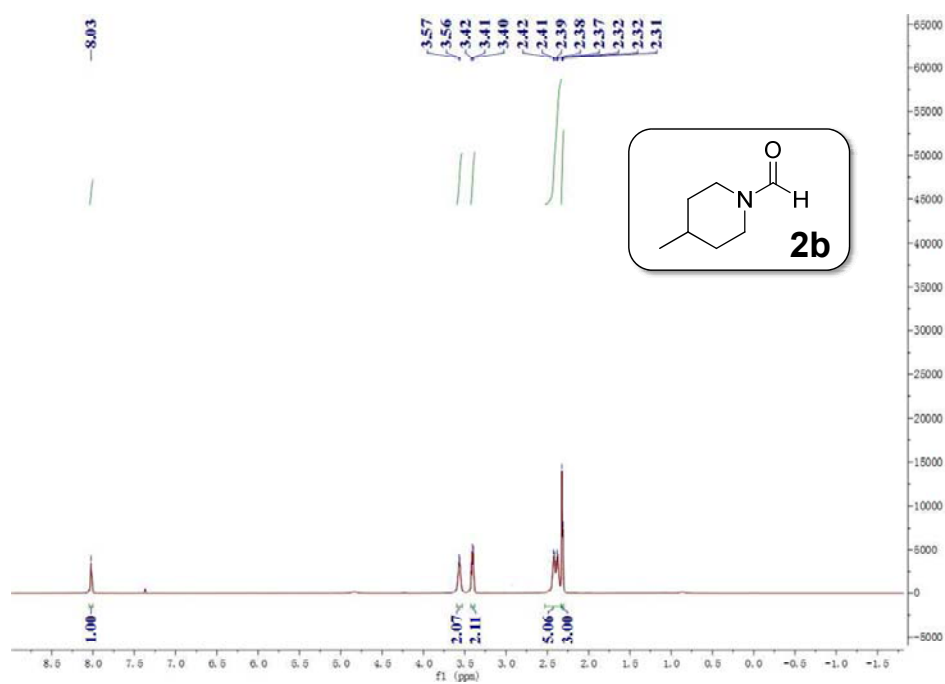

Figure S17.  $^{13}\text{C}$ NMR of **2b**

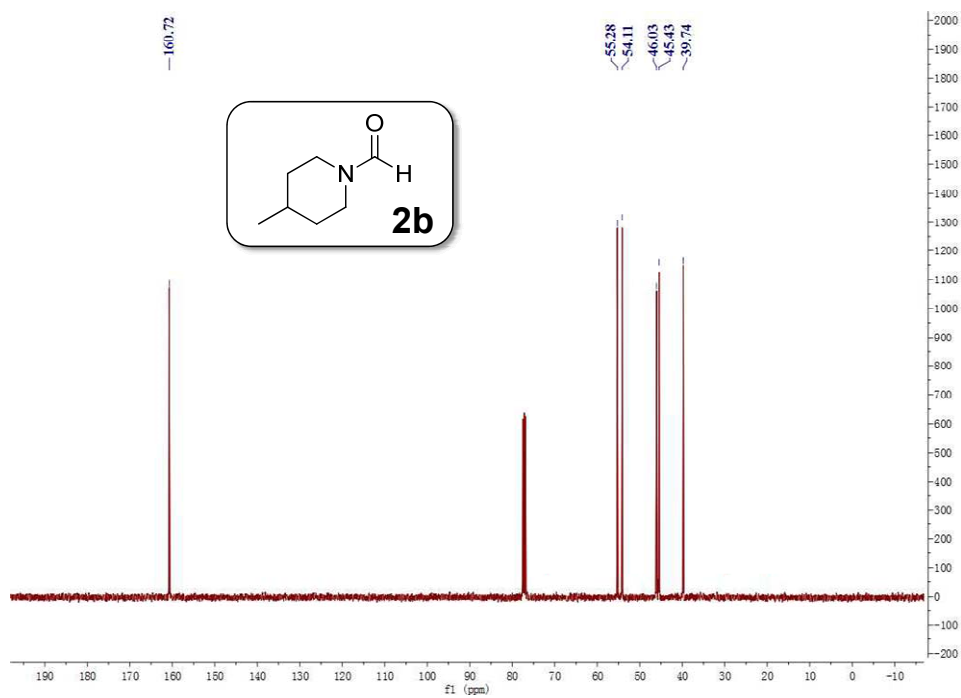

Figure S18.  $^1\text{H}$ NMR of **2c**

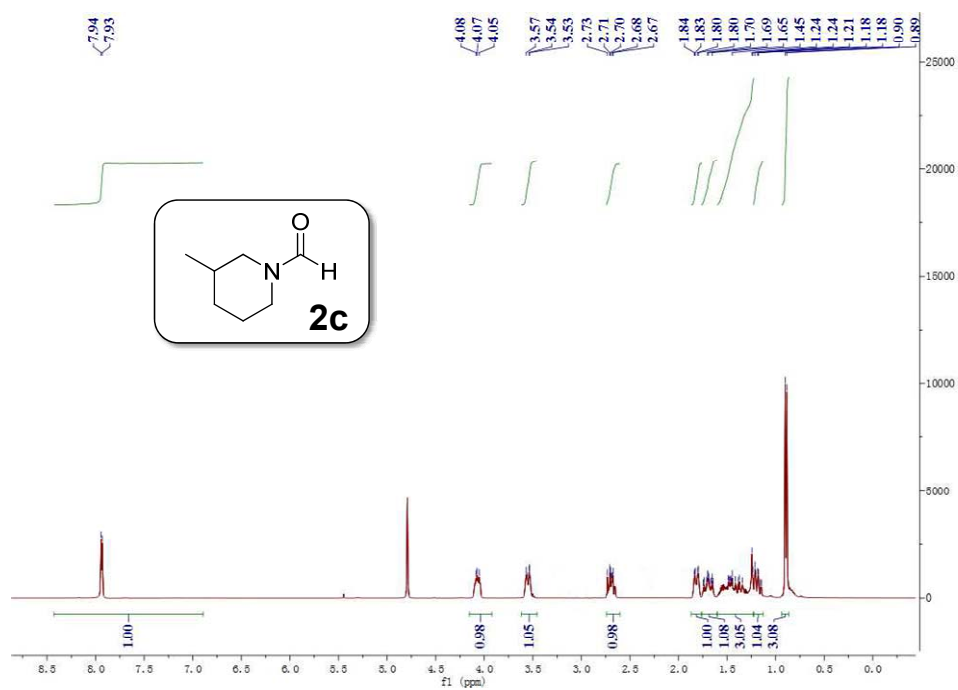

Figure S19.  $^{13}\text{C}$ NMR of **2c**

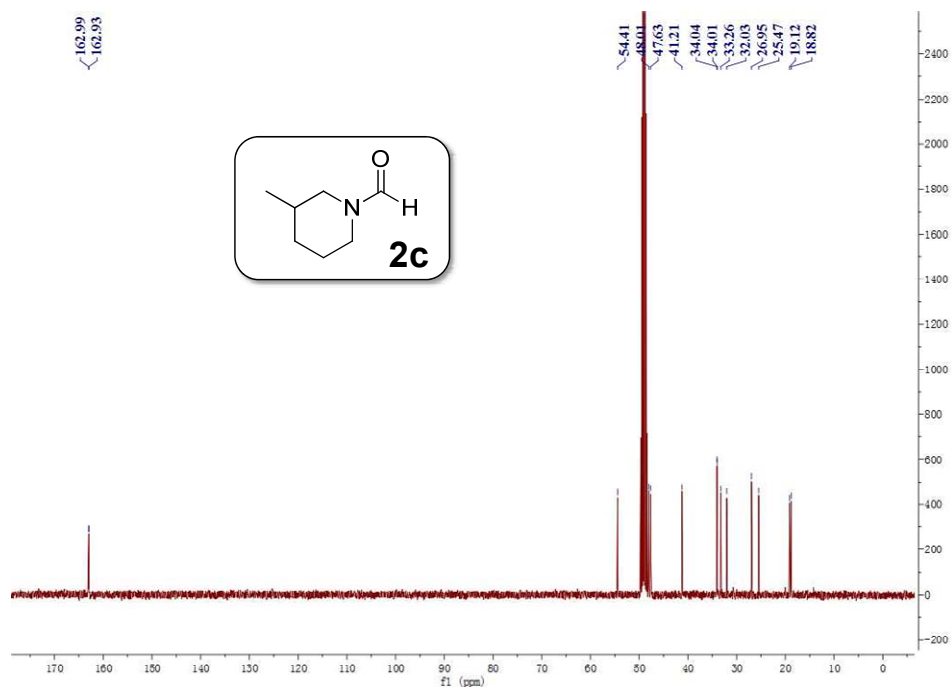

Figure S20.  $^1\text{H}$ NMR of **2d**

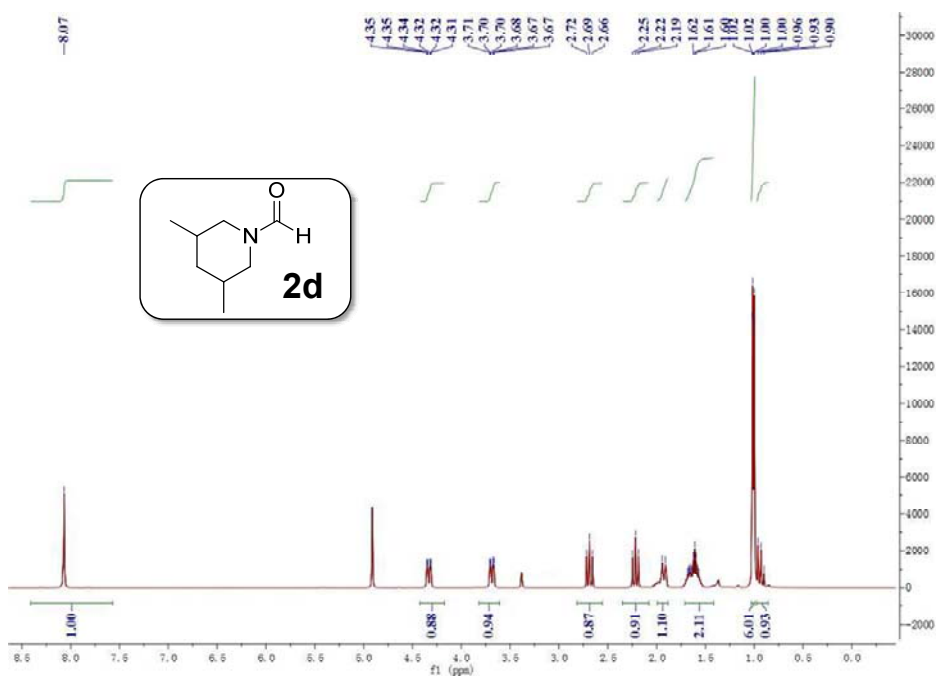

Figure S21.  $^{13}\text{C}$ NMR of **2d**

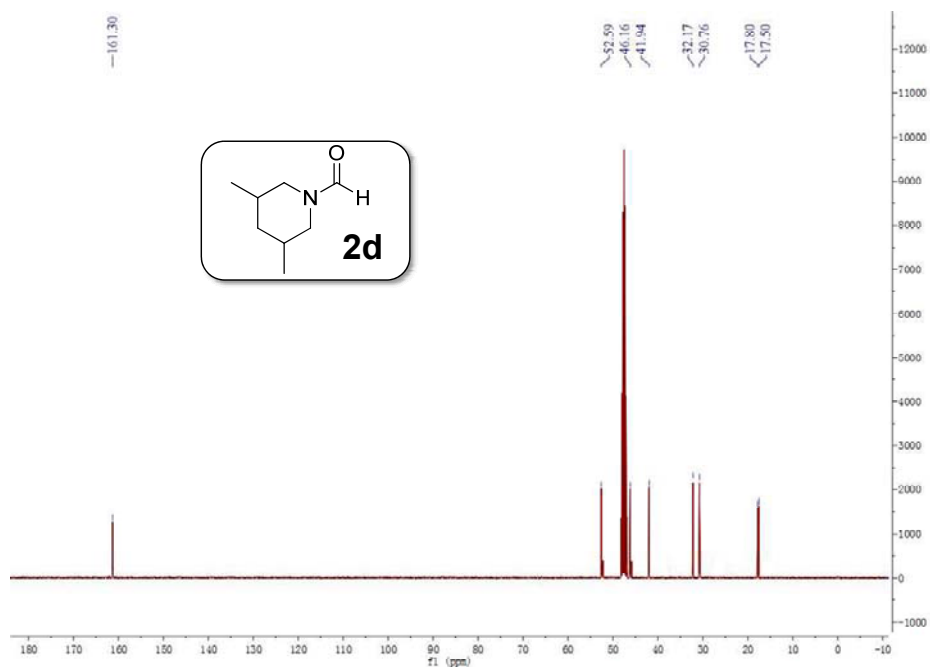

Figure S22.  $^1\text{H}$ NMR of **2e**

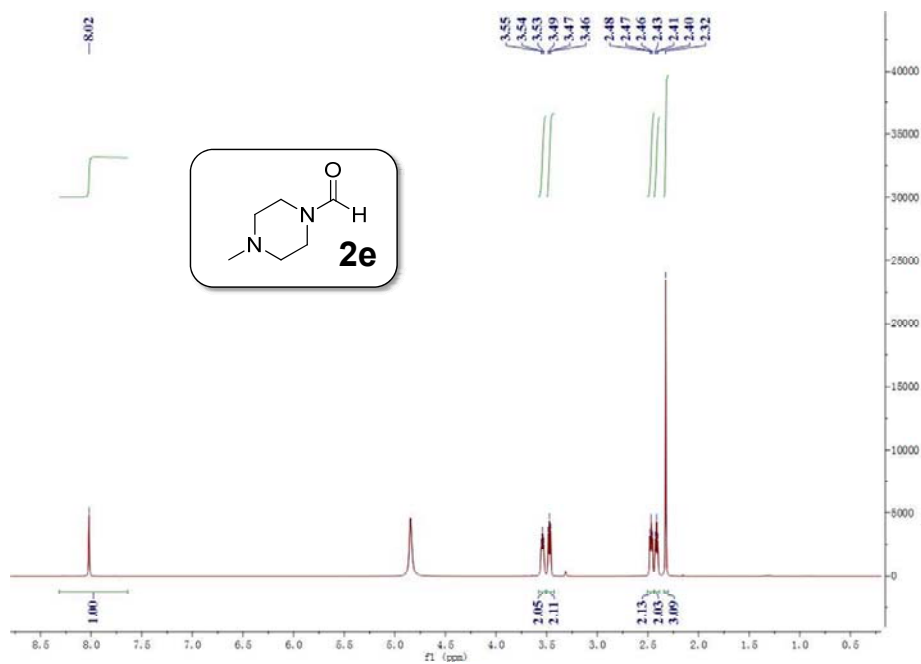

Figure S23.  $^{13}\text{C}$ NMR of **2e**

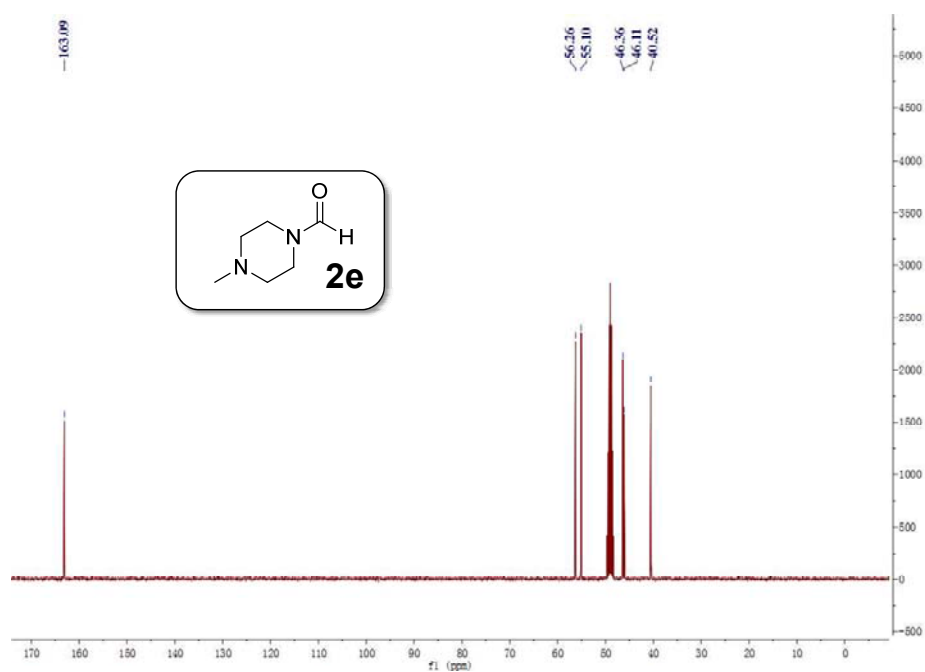



Figure S24.  $^1\text{H}$ NMR of **2f**

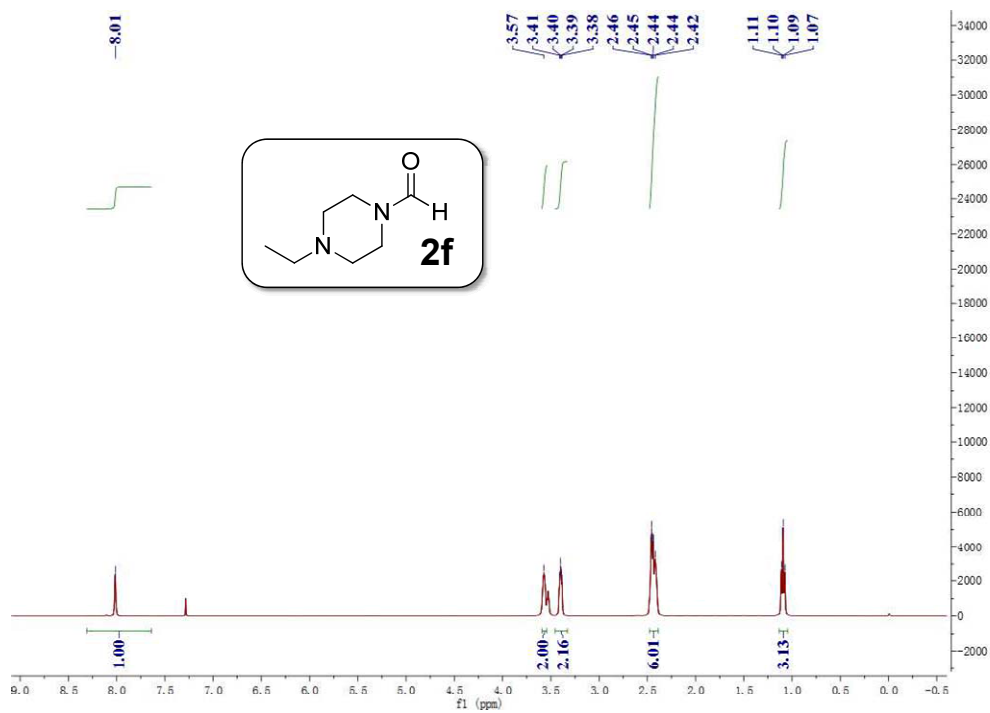

Figure S25.  $^{13}\text{C}$ NMR of **2f**

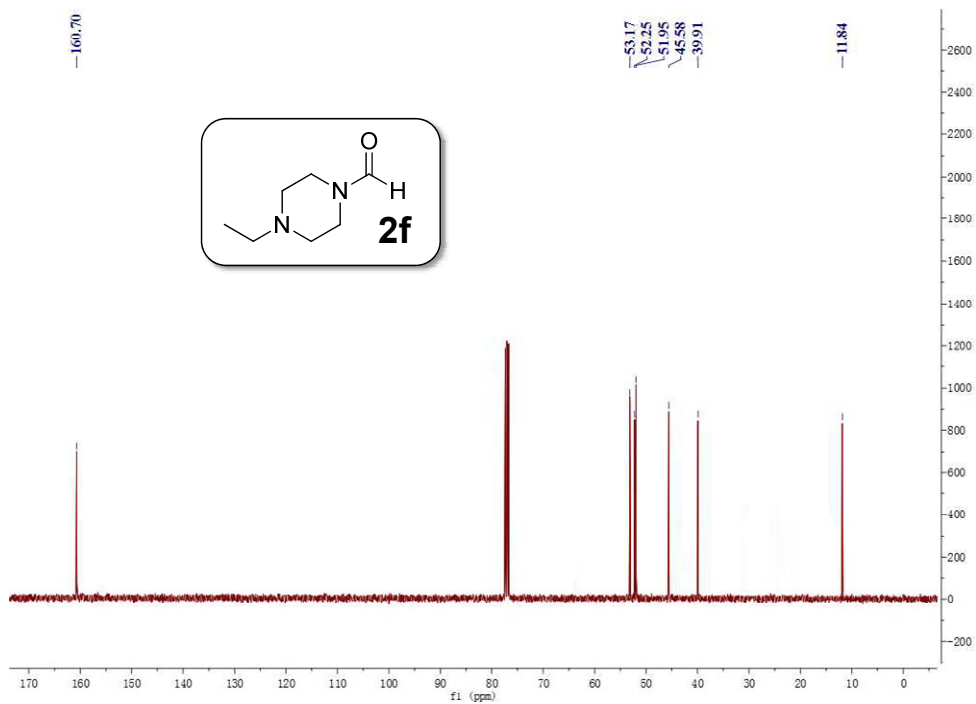

Figure S26.  $^1\text{H}$ NMR of **2g**

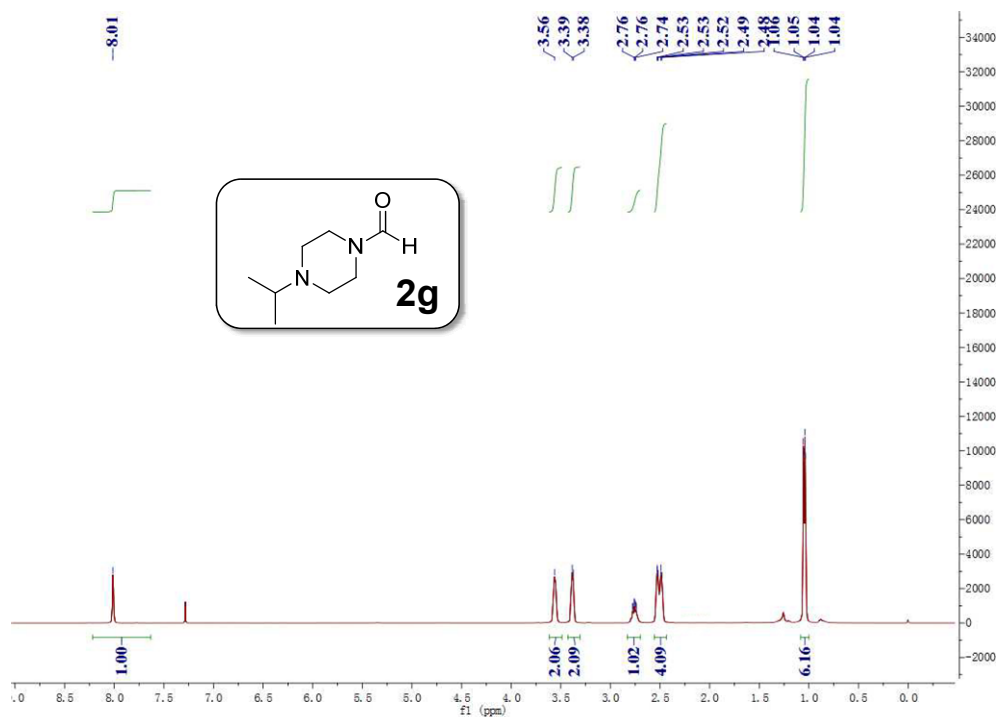

Figure S27.  $^{13}\text{C}$ NMR of **2g**

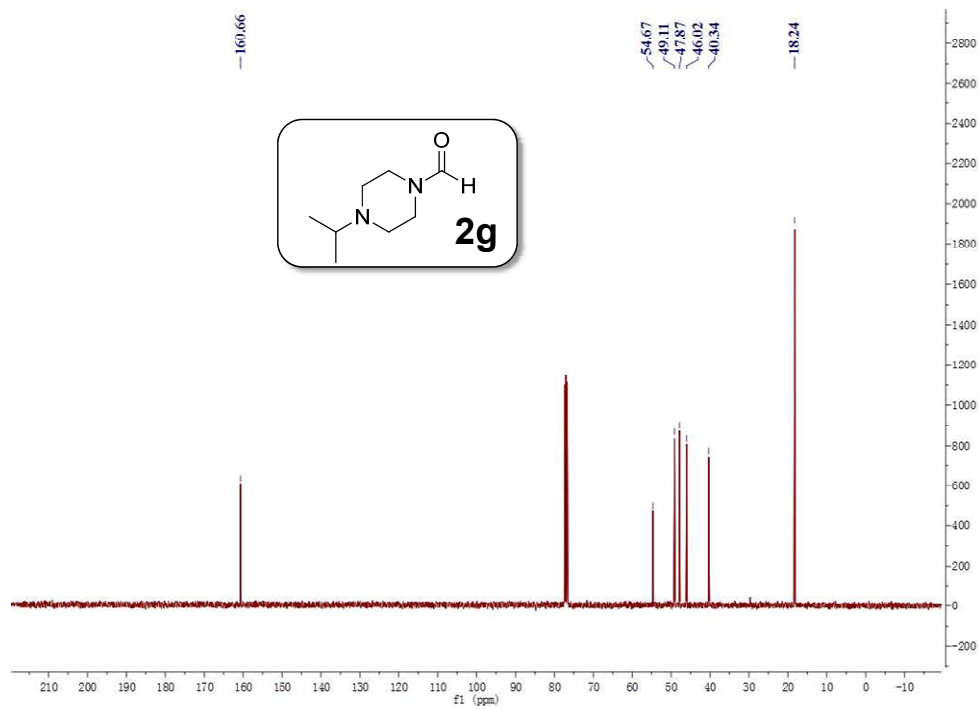

Figure S28.  $^1\text{H}$ NMR of **2h**

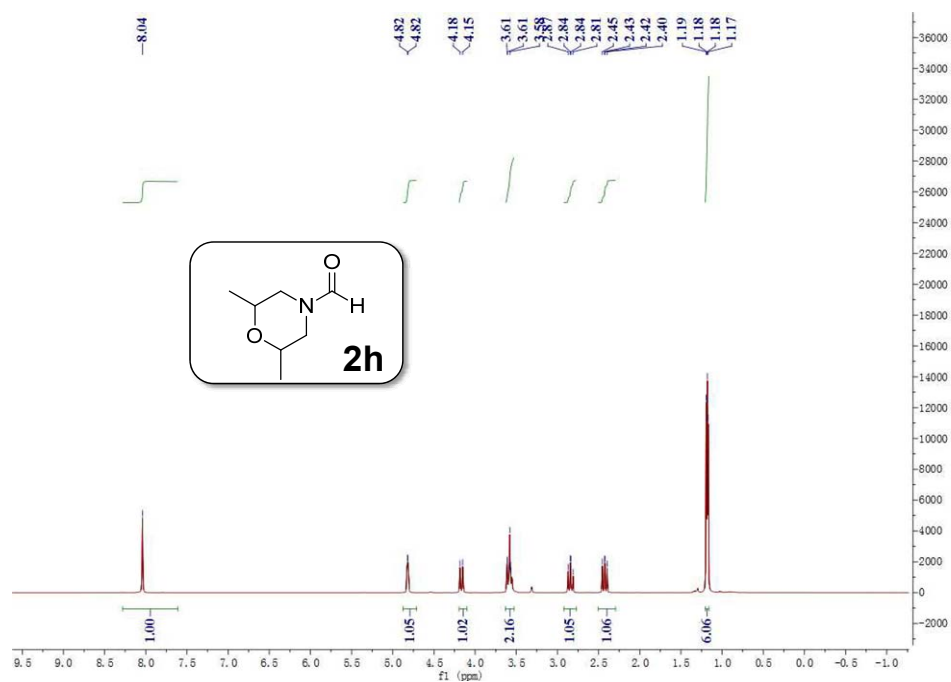

Figure S29.  $^{13}\text{C}$ NMR of **2h**

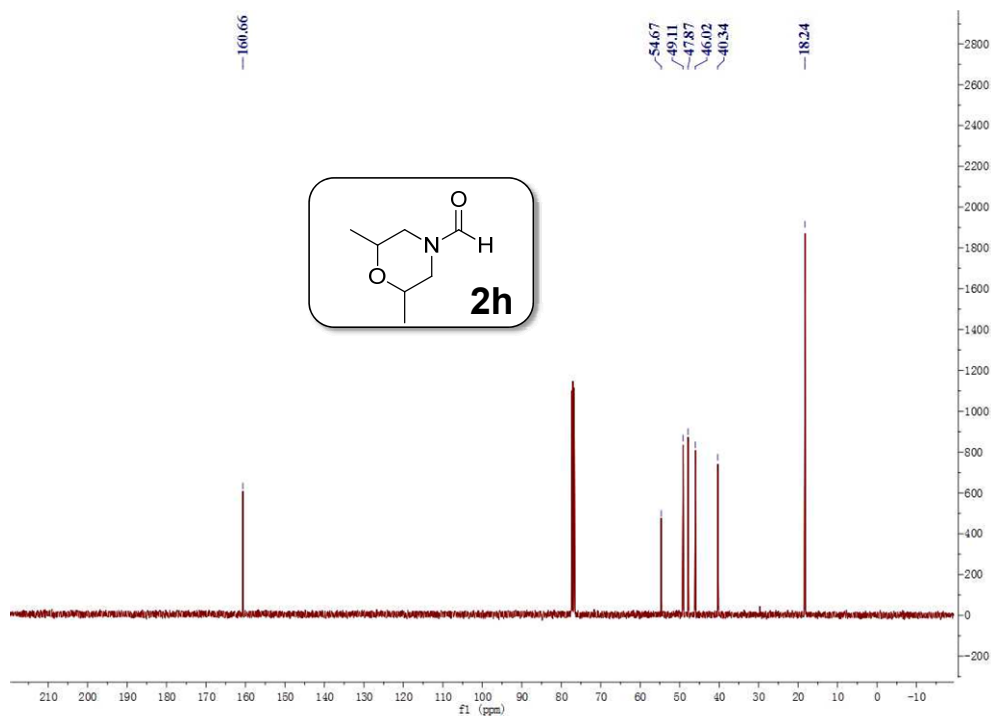

Figure S30.  $^1\text{H}$ NMR of **2i**

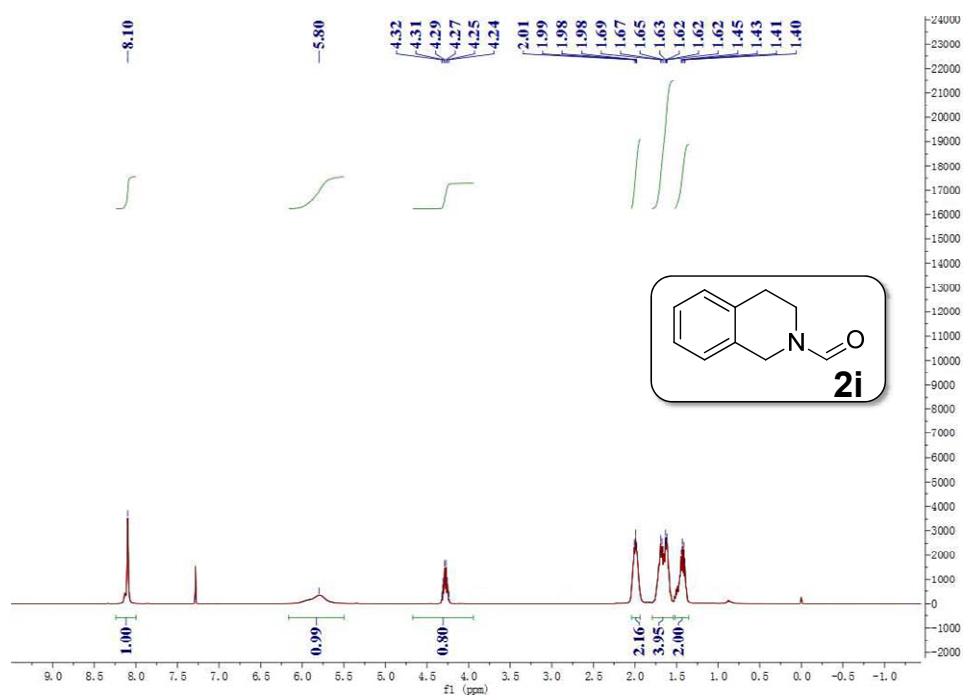

Figure S31.  $^{13}\text{C}$ NMR of **2i**

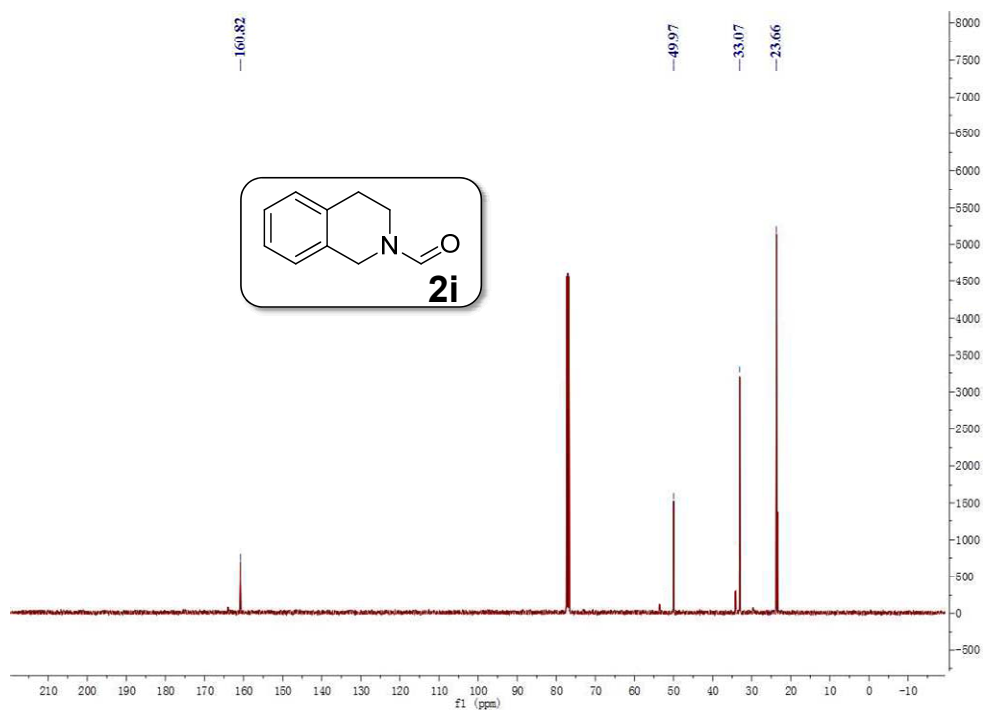

Figure S32.  $^1\text{H}$ NMR of **2k**

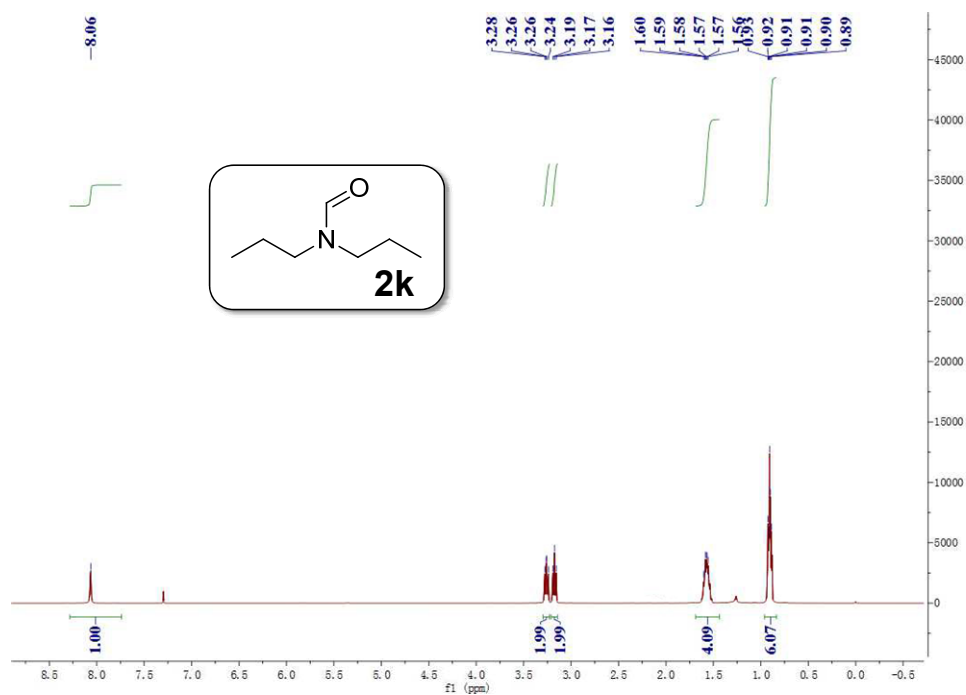

Figure S33.  $^{13}\text{C}$ NMR of **2k**

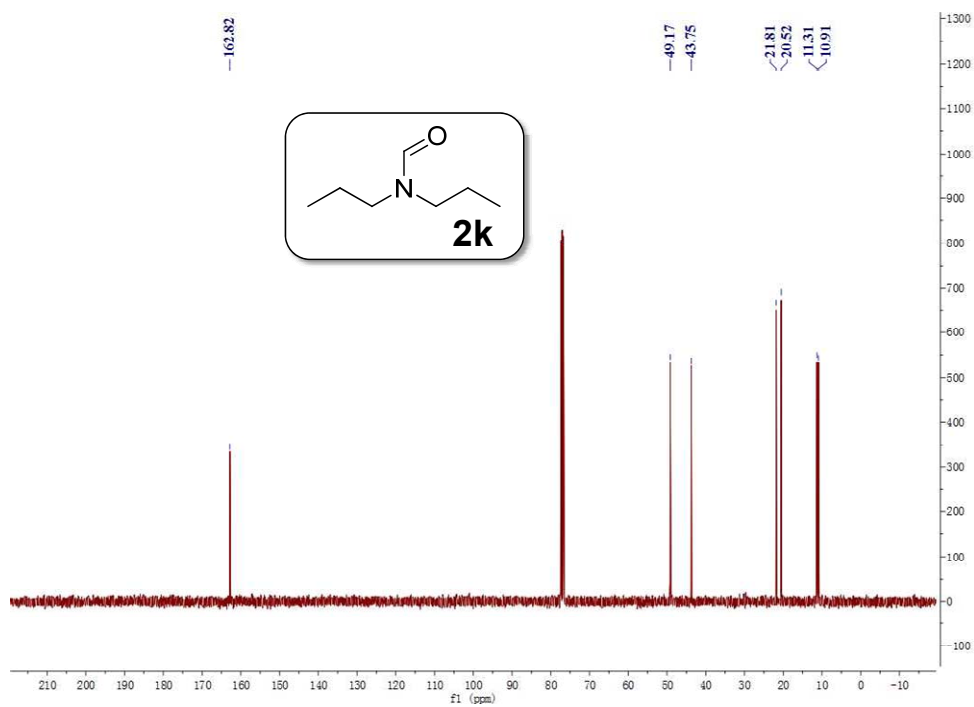

Figure S34.  $^1\text{H}$ NMR of **2I**

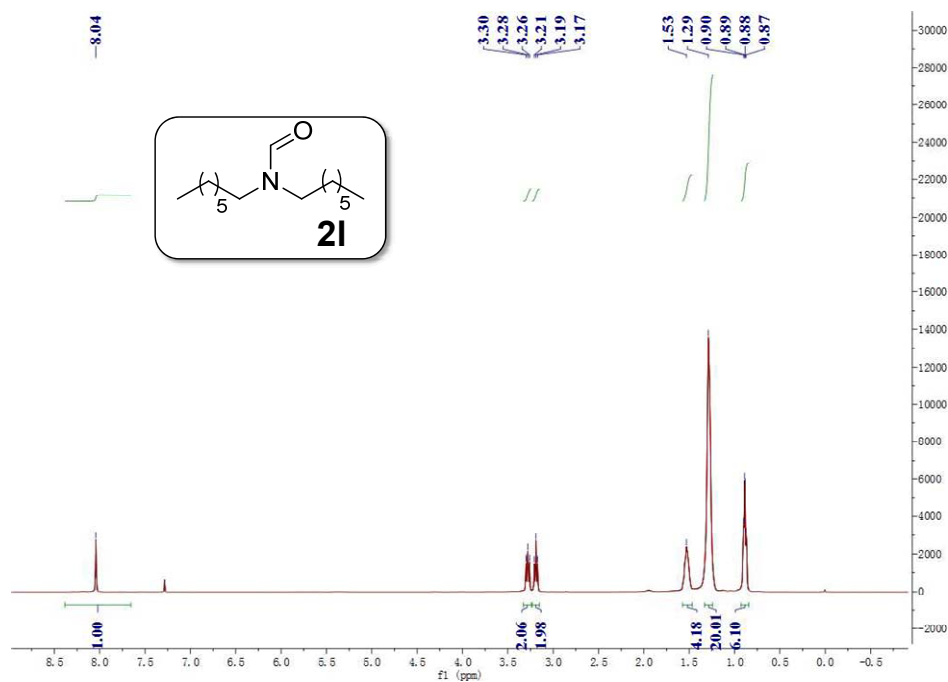

Figure S35.  $^{13}\text{C}$ NMR of **2I**

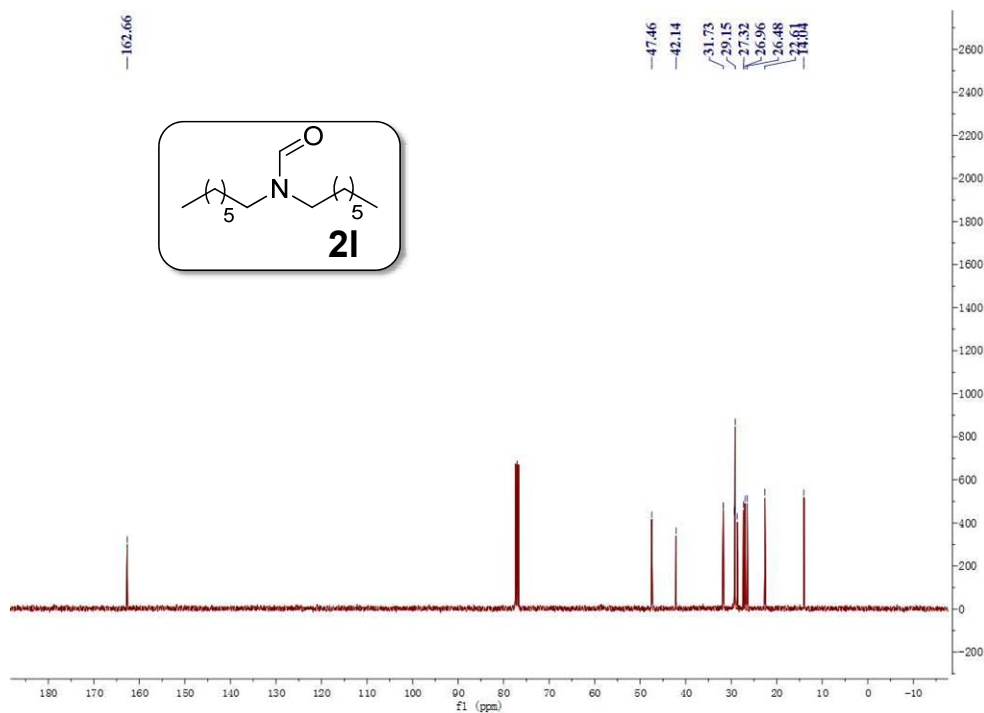

Figure S36.  $^1\text{H}$ NMR of **2m**

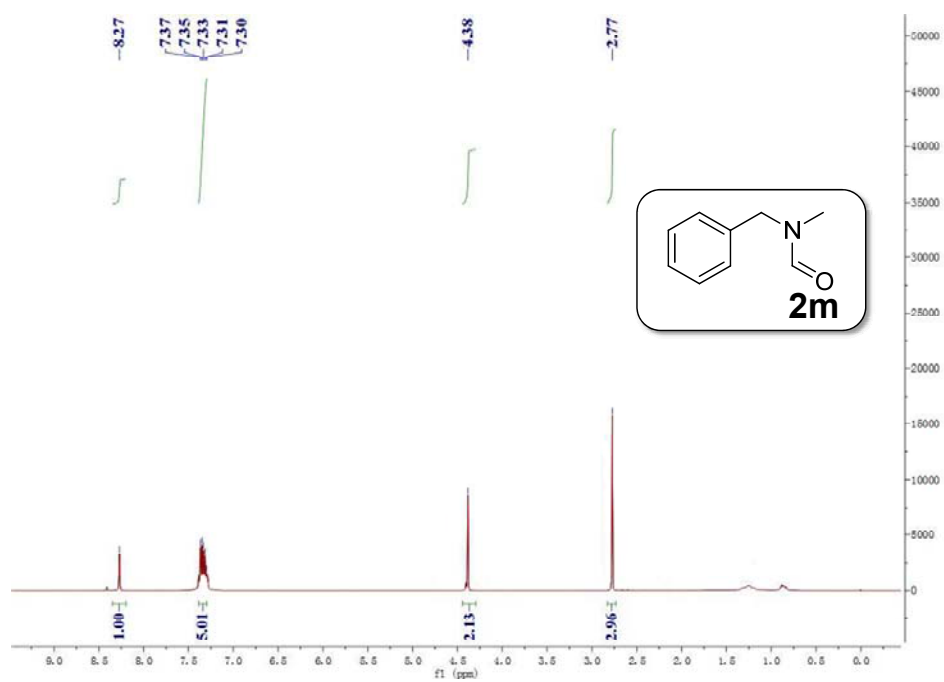

Figure S37.  $^{13}\text{C}$ NMR of **2m**

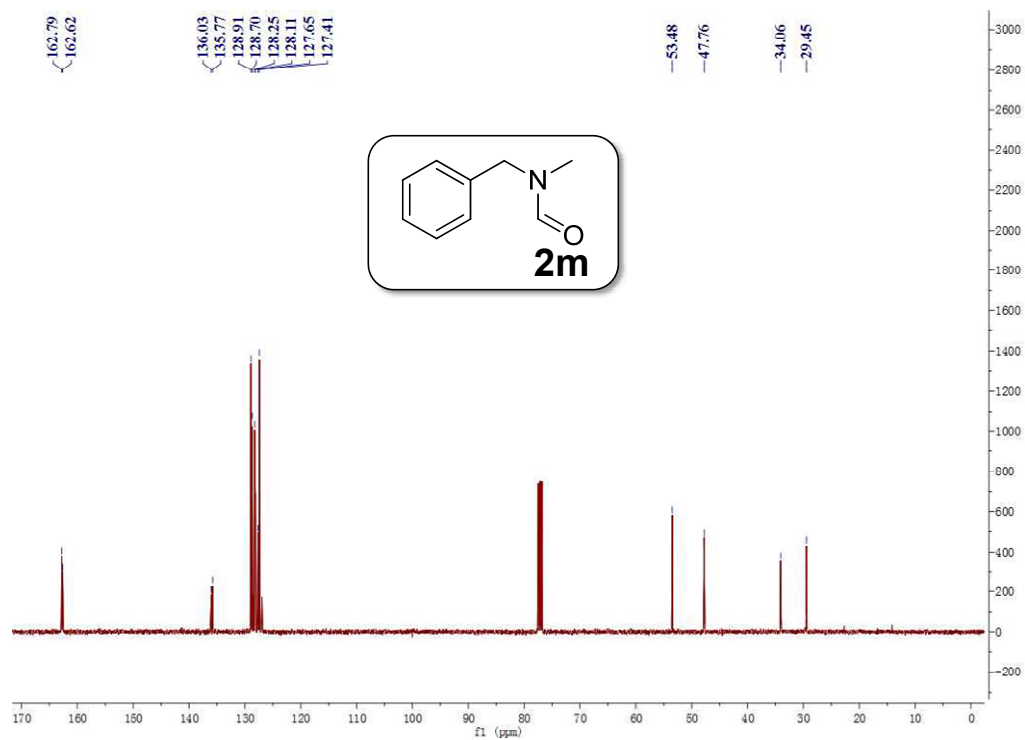

Figure S38.  $^1\text{H}$ NMR of **2n**

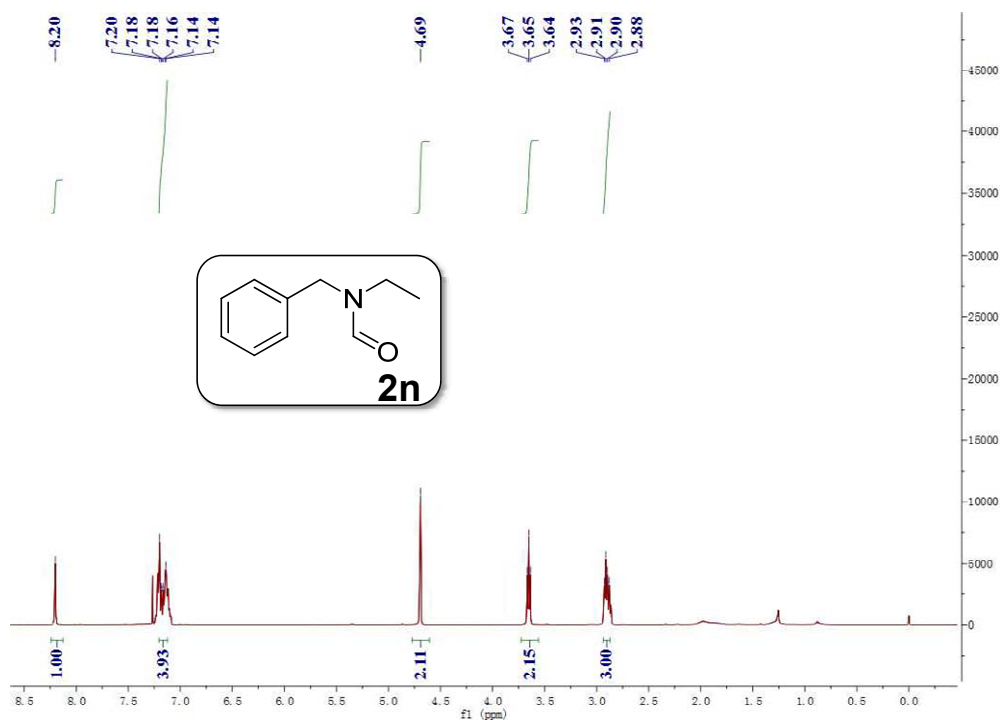

Figure S39.  $^{13}\text{C}$ NMR of **2n**

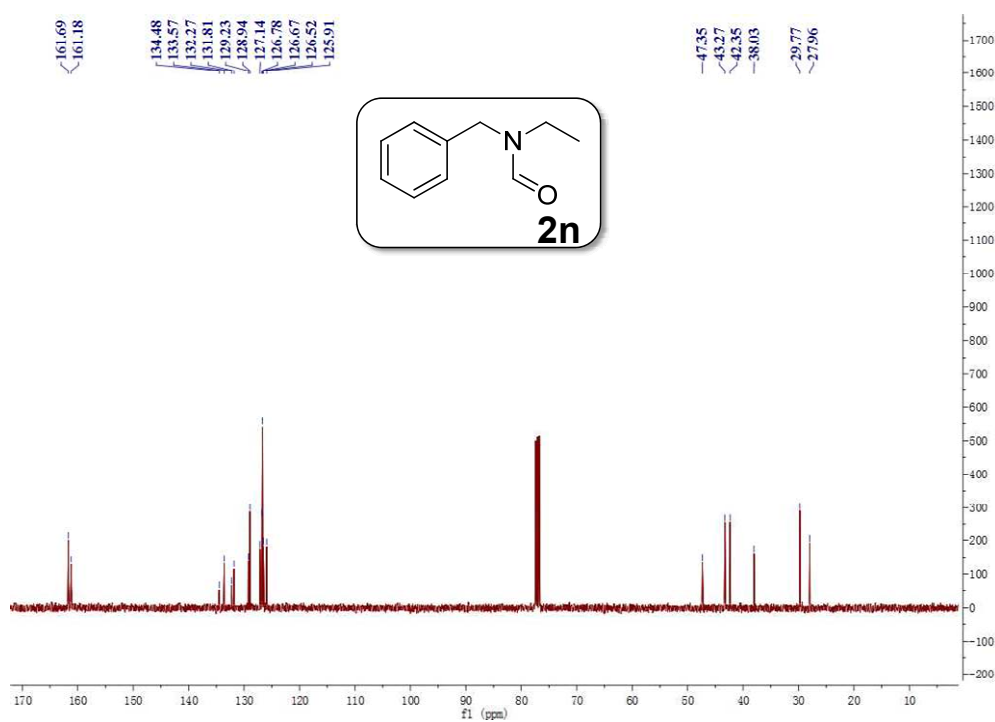



Figure S40.  $^1\text{H}$ NMR of **2o**

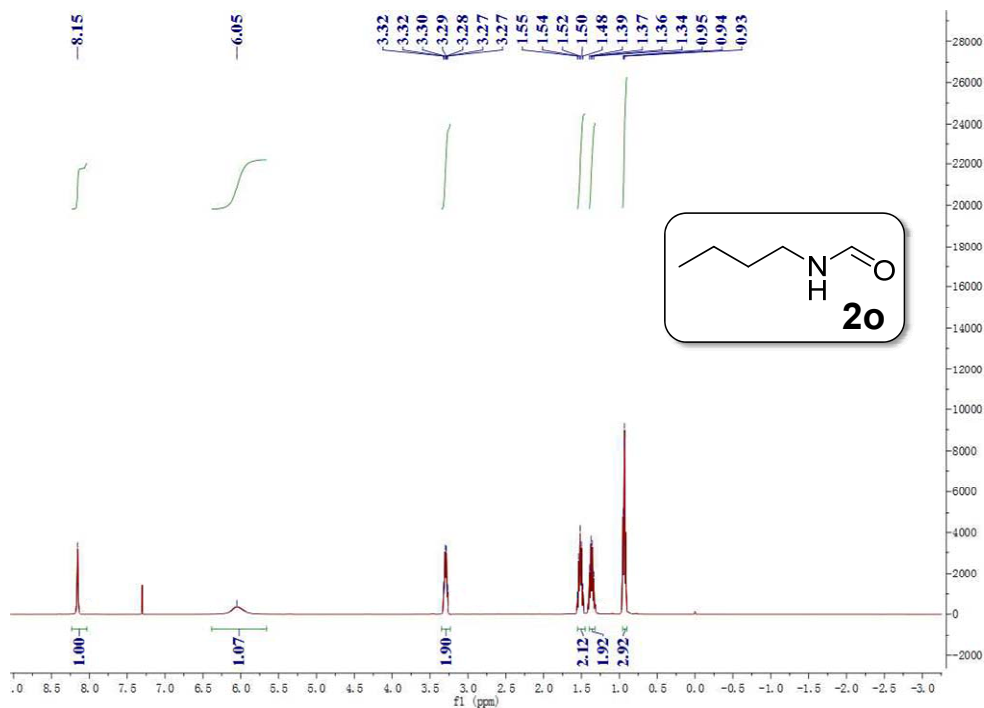

Figure S41.  $^{13}\text{C}$ NMR of **2o**

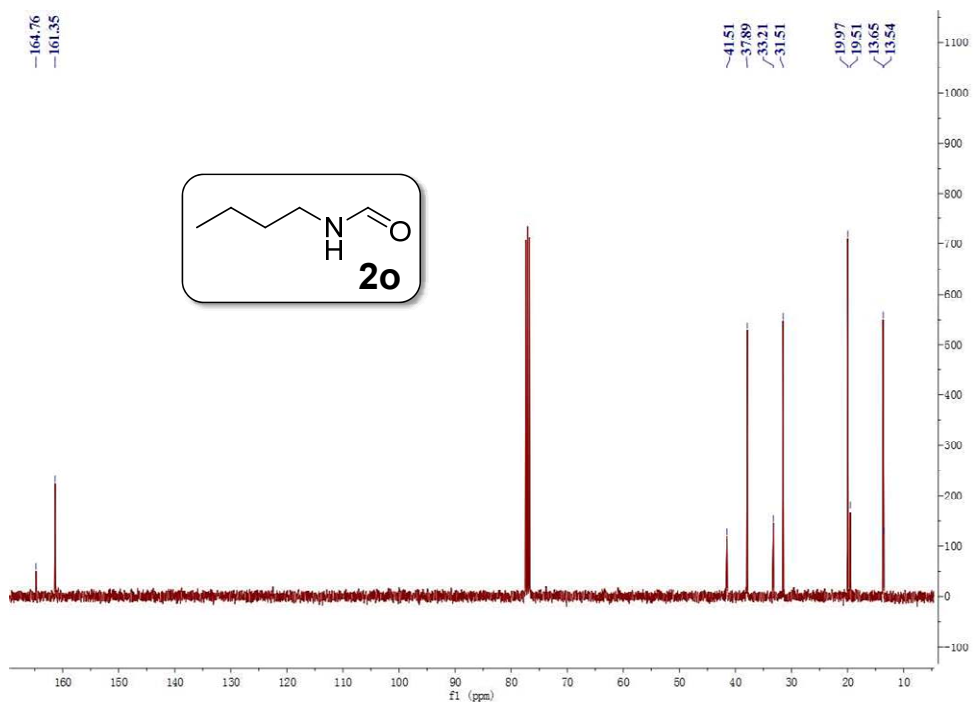

Figure S42.  $^1\text{H}$ NMR of **2p**

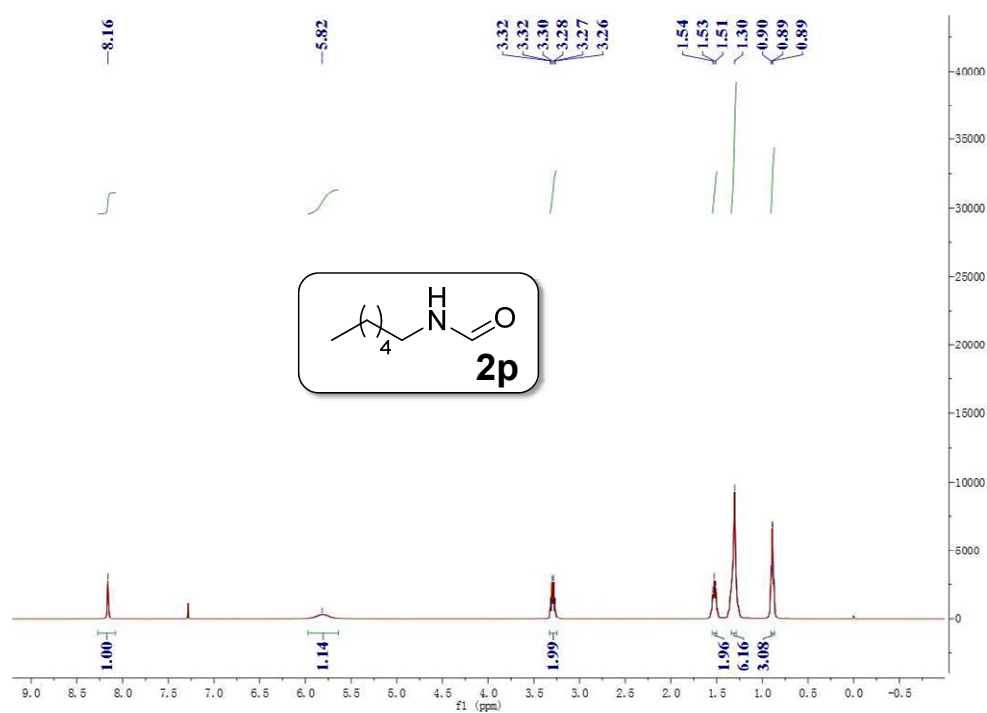

Figure S43.  $^{13}\text{C}$ NMR of **2p**

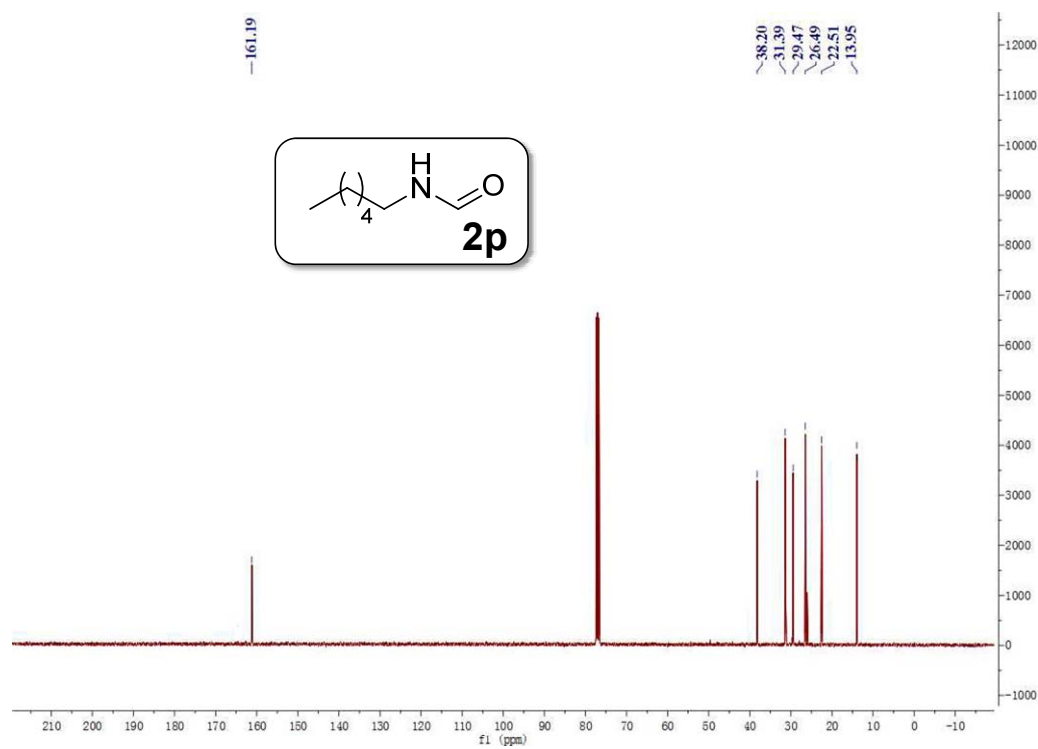

Figure S44.  $^1\text{H}$ NMR of **2q**

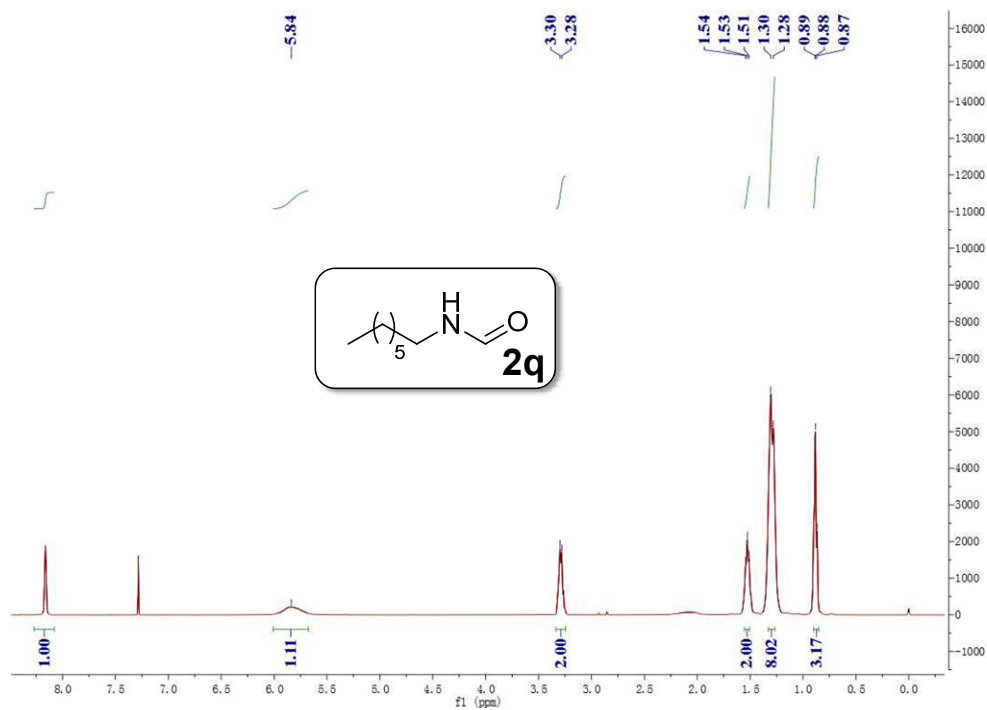

Figure S45.  $^{13}\text{C}$ NMR of **2q**

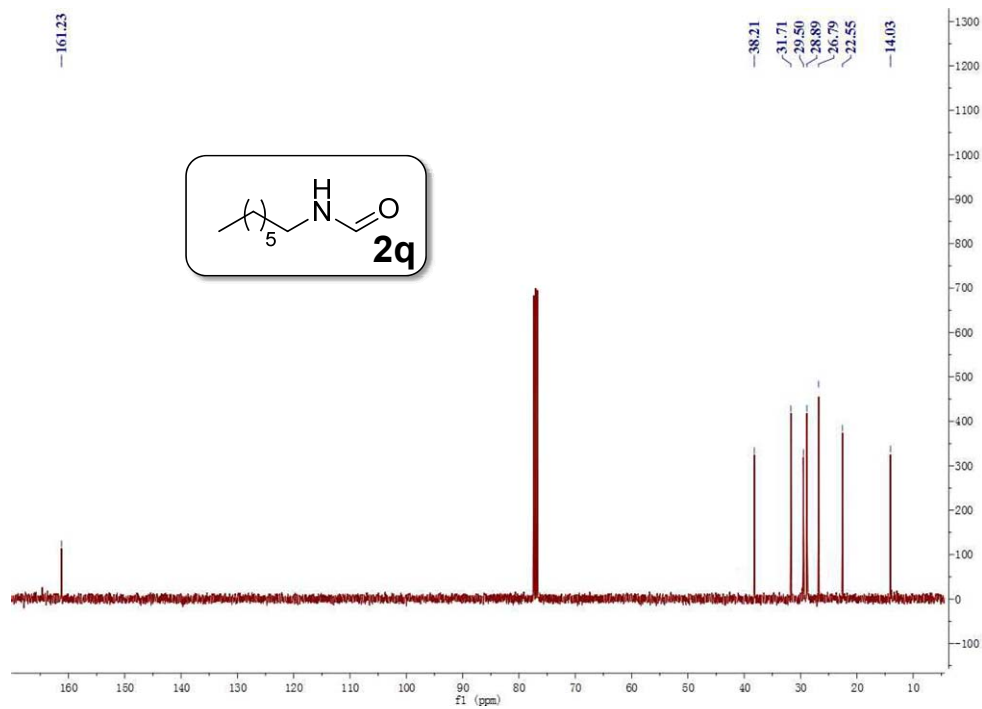

Figure S46.  $^1\text{H}$ NMR of **2r**

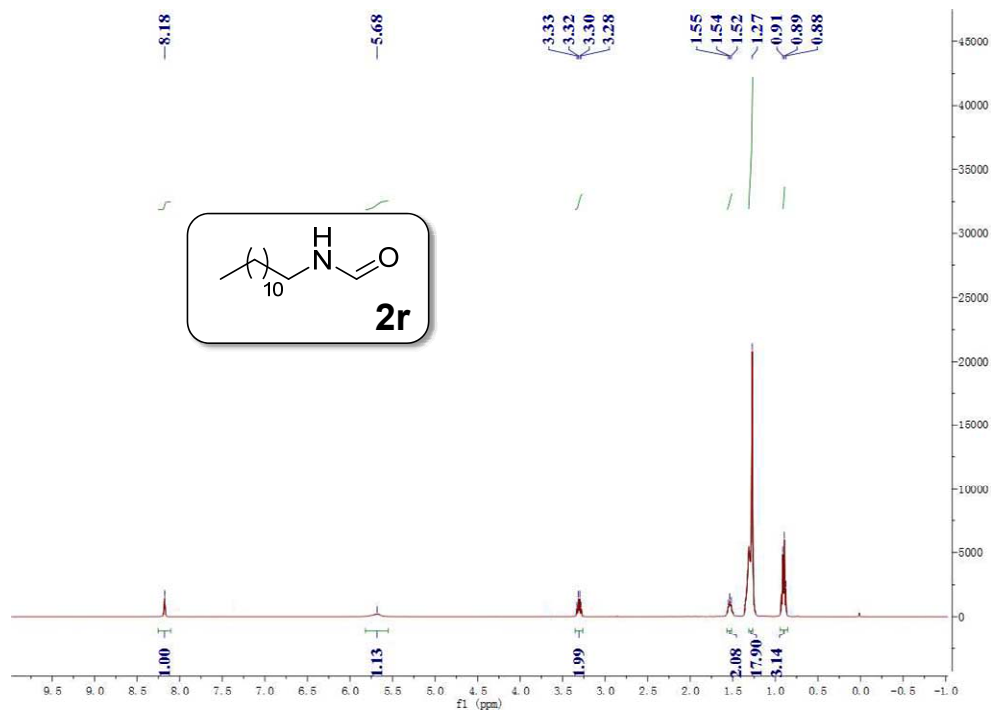

Figure S47.  $^{13}\text{C}$ NMR of **2r**

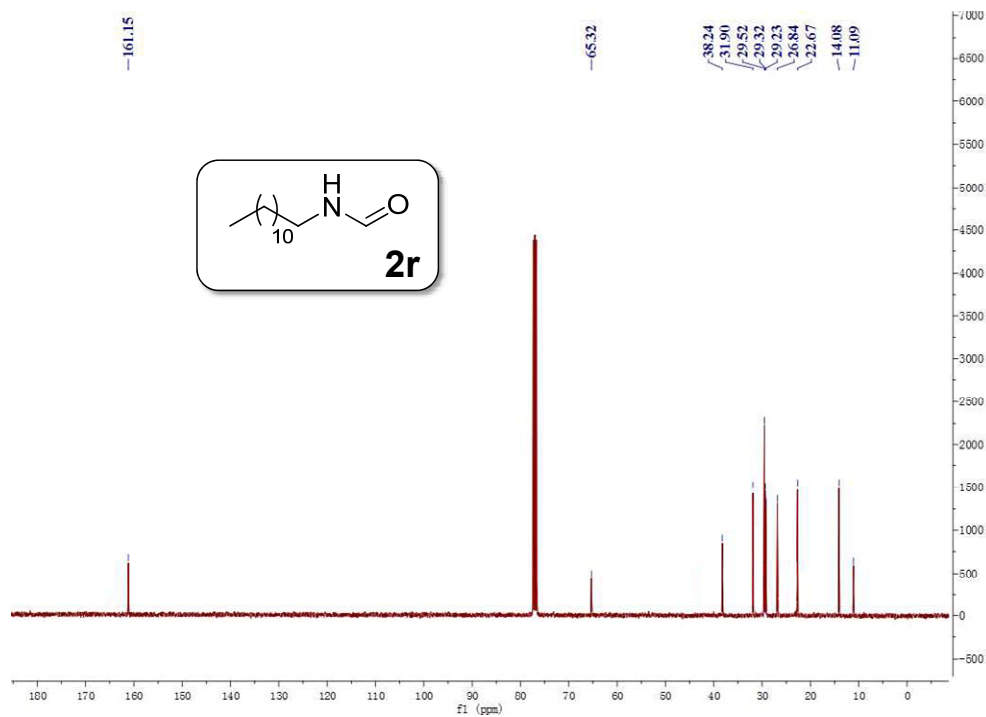

Figure S48.  $^1\text{H}$ NMR of **2s**

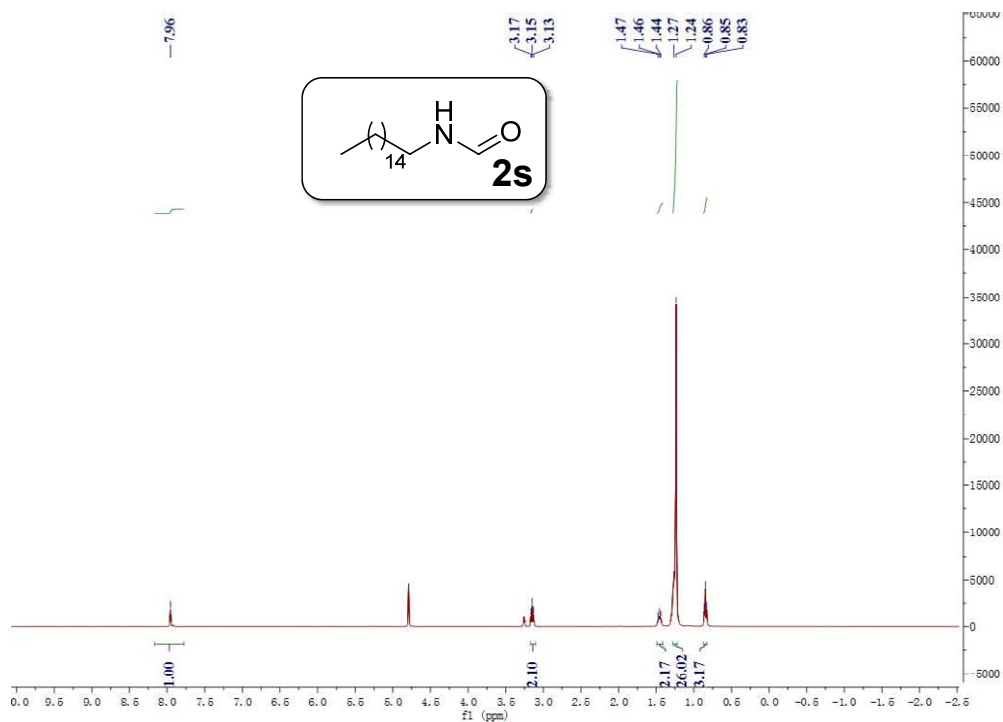

Figure S49.  $^{13}\text{C}$ NMR of **2s**

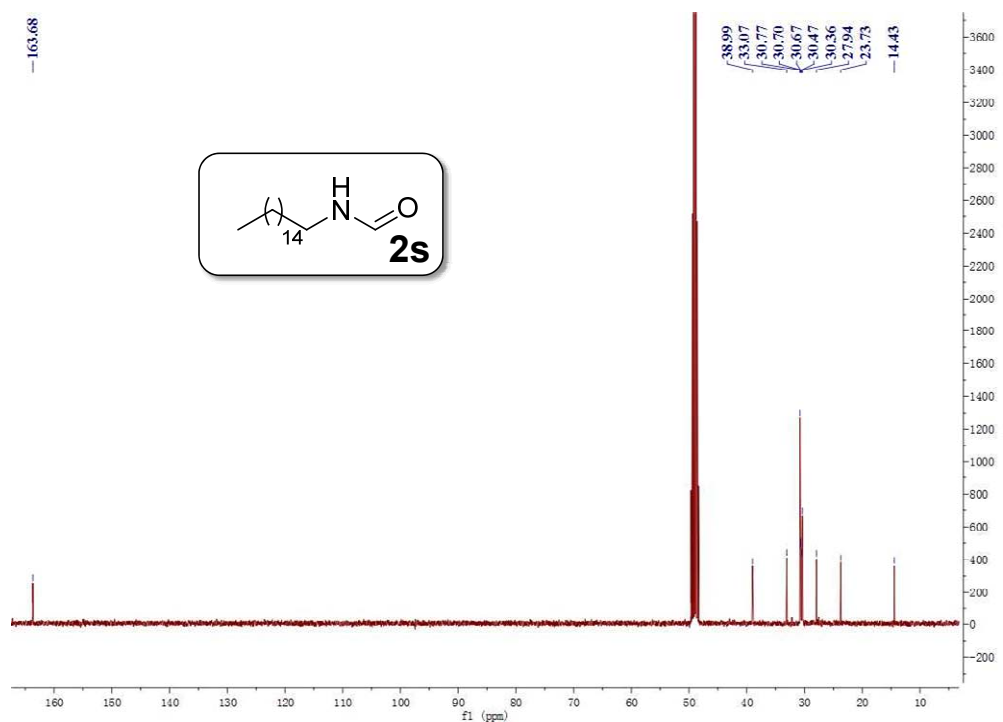

Figure S50.  $^1\text{H}$ NMR of **2t**

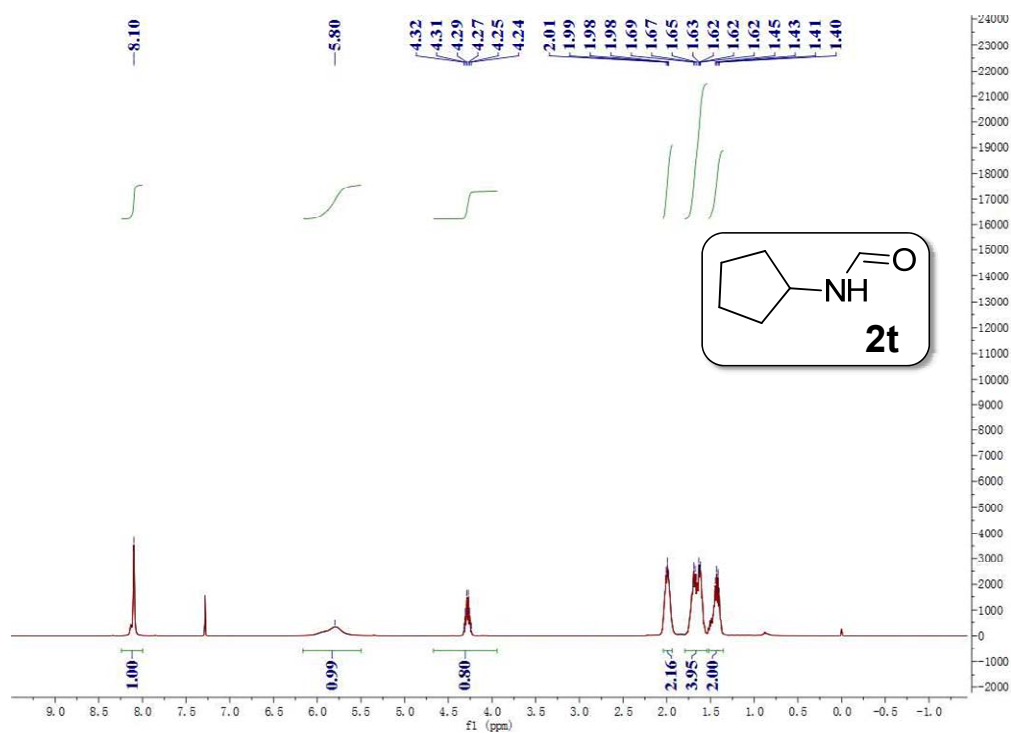

Figure S51.  $^{13}\text{C}$ NMR of **2t**

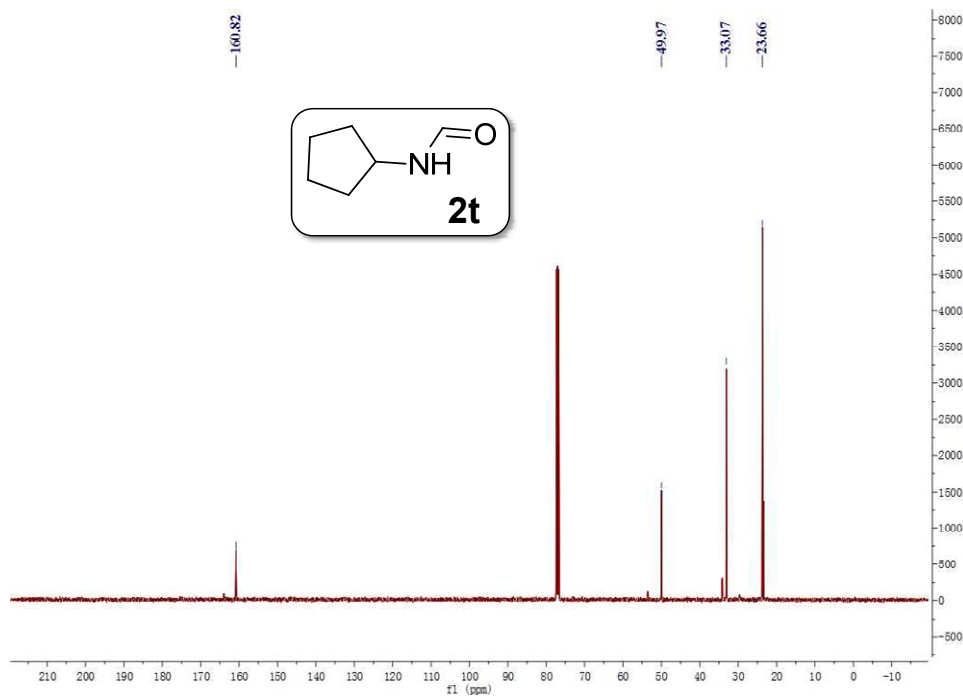

Figure S52.  $^1\text{H}$ NMR of **2u**

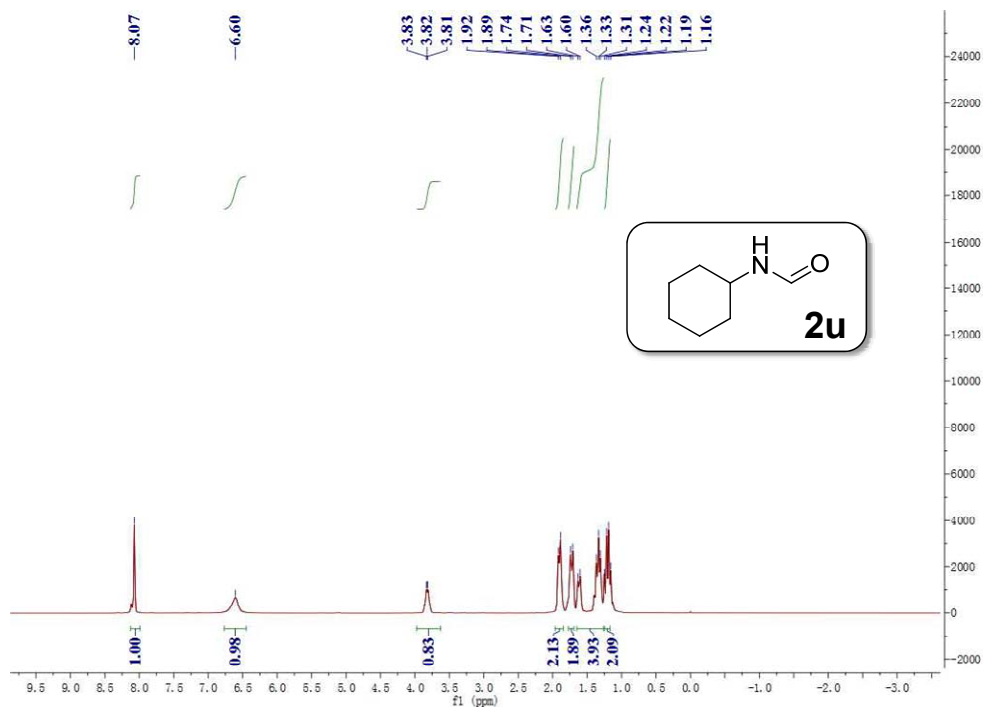

Figure S53.  $^{13}\text{C}$ NMR of **2u**

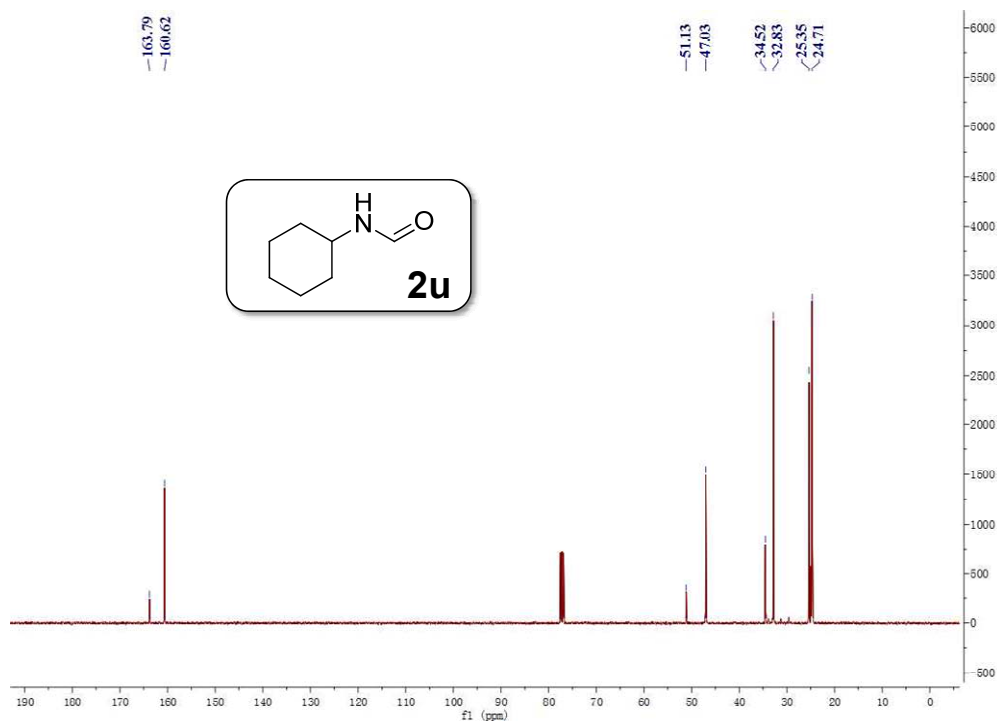

Figure S54.  $^1\text{H}$ NMR of **2v**

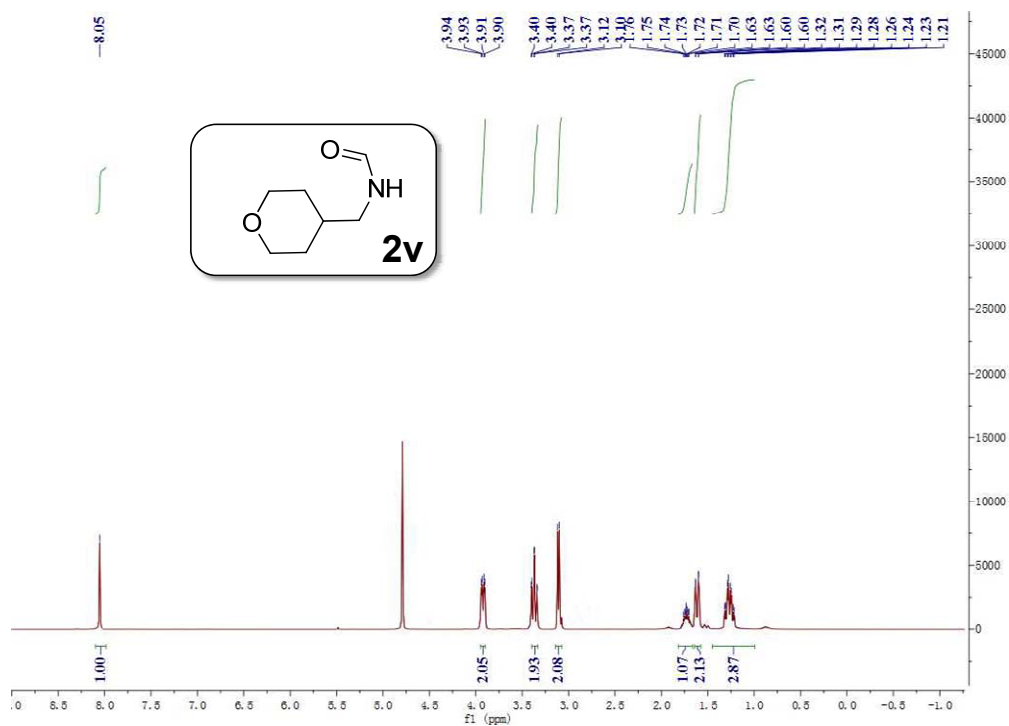

Figure S55.  $^{13}\text{C}$ NMR of **2v**

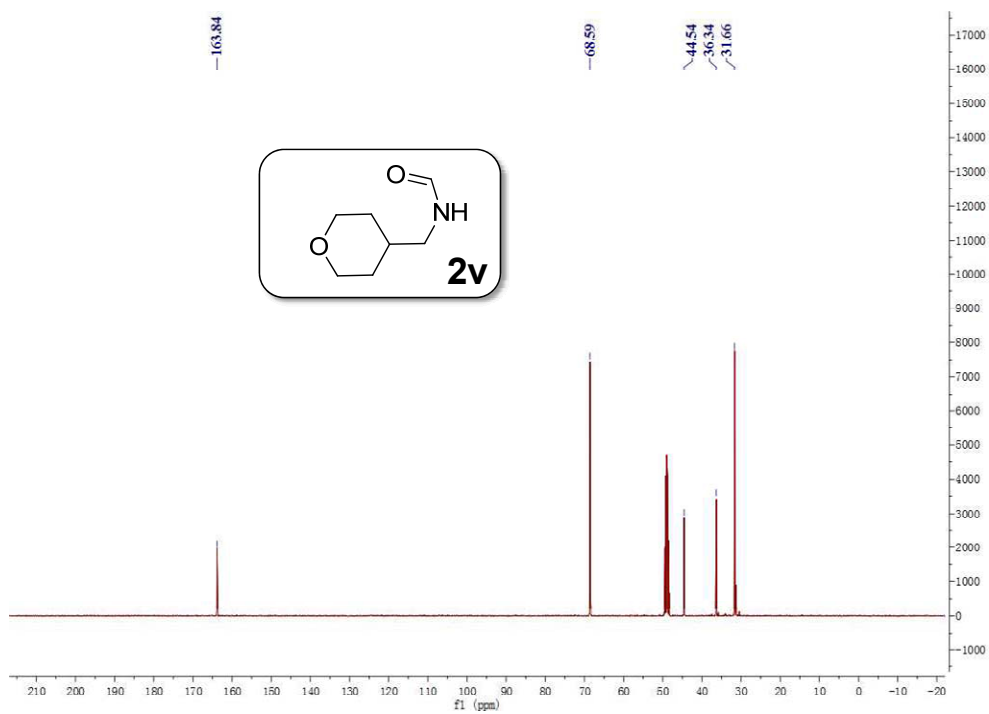



Figure S56.  $^1\text{H}$ NMR of **2w**

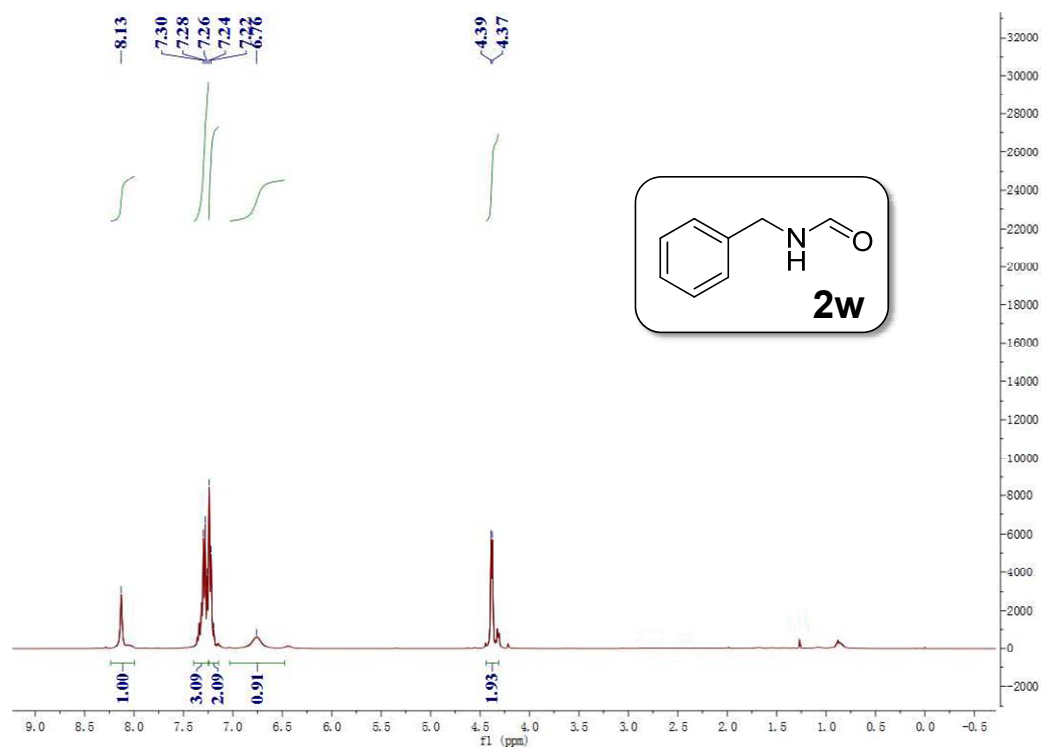

Figure S57.  $^{13}\text{C}$ NMR of **2w**

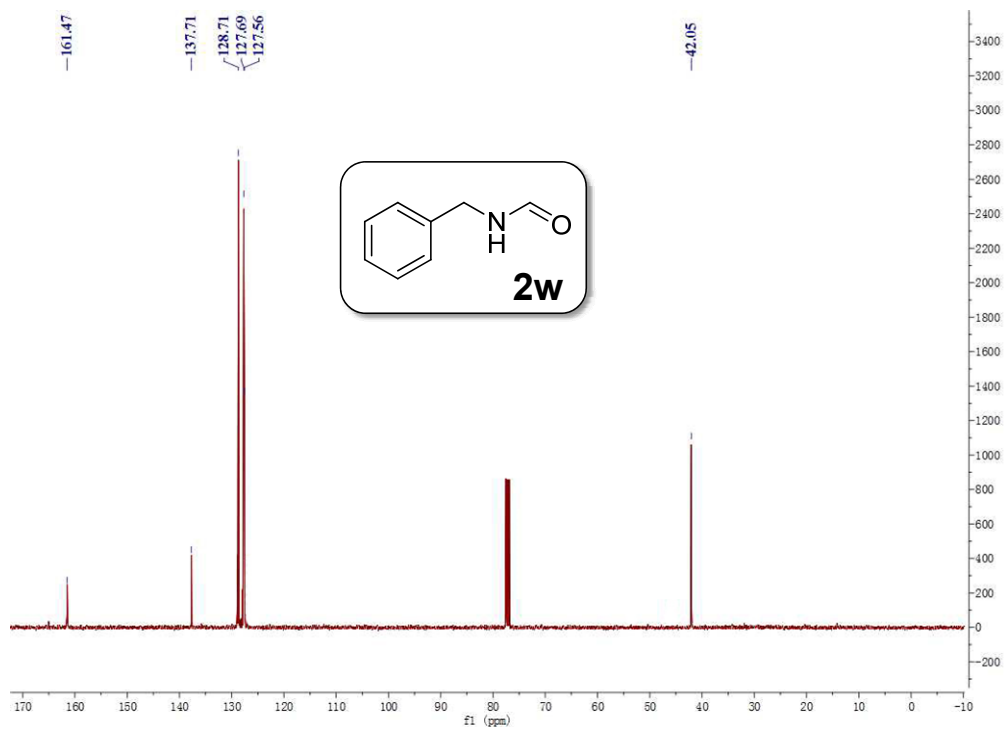

Figure S58.  $^1\text{H}$ NMR of **2x**

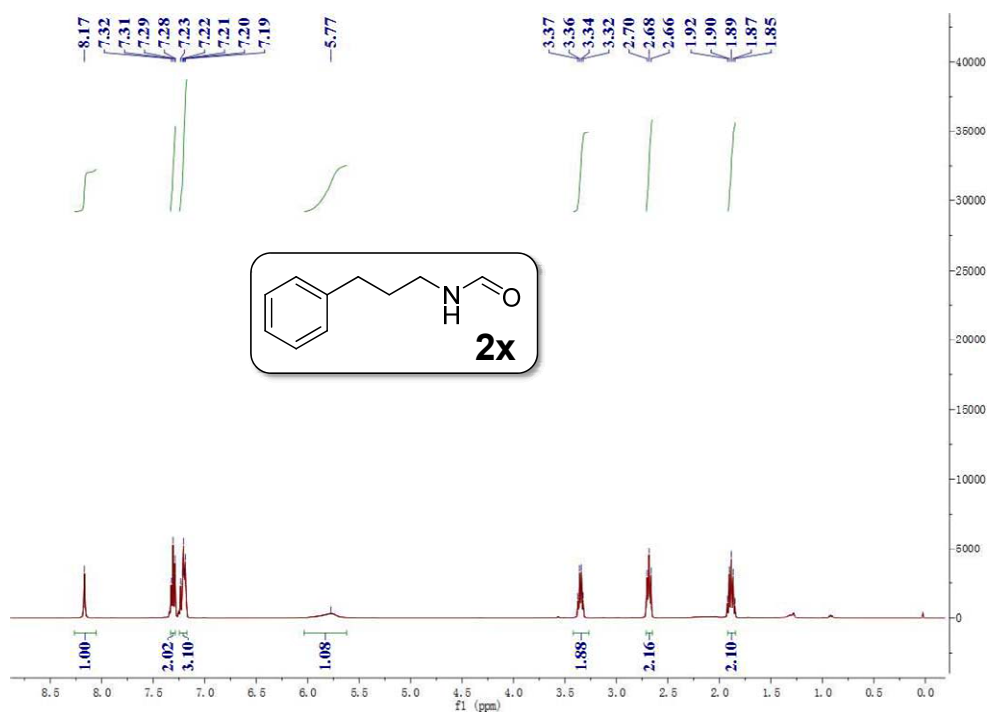

Figure S59.  $^{13}\text{C}$ NMR of **2x**

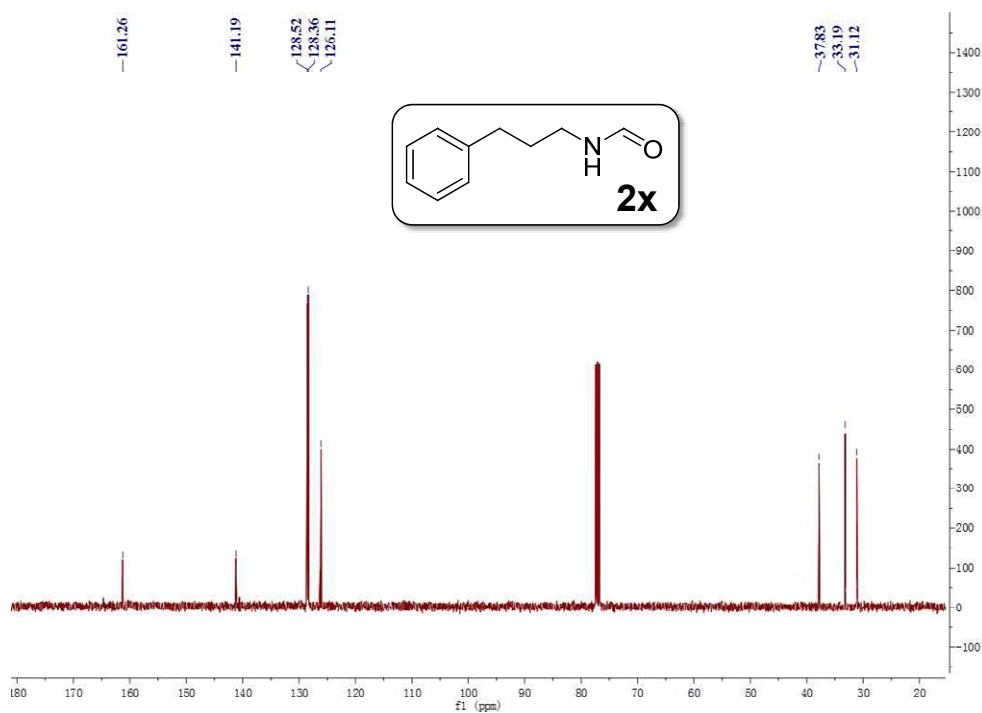

Supplement: Supplementary file 1 [file 8676187]
